# Supplementary material for: Synthesis of Novel 2,3-Dihydro-1,5-Benzothiazepines as α-Glucosidase Inhibitors: In Vitro, In Vivo, Kinetic, SAR, Molecular Docking, and QSAR Studies
Source: PubMed Central journal article supplement — ACS Omega. 2022 Aug 17;7(34):30215–32. doi: 10.1021/acsomega.2c03328 (PMC9435035; doi:10.1021/acsomega.2c03328), 2022-08-17
Supplement: ao2c03328_si_001.pdf [file ao2c03328_si_001.pdf]

## **Supporting information file for manuscript**

### **Synthesis of Novel 2,3-Dihydro-1,5-Benzothiazepines as $\alpha$ -Glucosidase Inhibitors: *In Vitro, In Vivo, Kinetic, SAR, Molecular Docking and QSAR Studies***

Rabia Mehmood<sup>a</sup>, Ehsan Ullah Mughal<sup>\*b</sup>, Eslam B. Elkaeed<sup>c</sup>, Rami J. Obaid<sup>d</sup>, Yasir Nazir<sup>e,f</sup>, Hanan A. Al-Ghulikah<sup>g</sup>, Nafeesa Naeem<sup>b</sup>, Munirah M. Al-Rooqi<sup>d</sup>, Saleh A. Ahmed<sup>d, h</sup>, Syed Wadood Ali Shah<sup>\*i</sup>, Amina Sadiq<sup>\*a</sup>

<sup>a</sup>*Department of Chemistry, Govt. College Women University, Sialkot-51300, Pakistan*

<sup>b</sup>*Department of Chemistry, University of Gujrat, Gujrat-50700, Pakistan*

<sup>c</sup>*Department of Pharmaceutical Sciences, College of Pharmacy, AlMaarefa University, Riyadh 13713, Saudi Arabia*

<sup>d</sup>*Department of Chemistry, Faculty of Applied Science, Umm Al-Qura University, 21955 Makkah Saudi Arabia*

<sup>e</sup>*Department of Chemistry, Allama Iqbal Open University, Islamabad-44000 Pakistan*

<sup>f</sup>*Department of Chemistry, University of Sialkot, Sialkot-51300, Pakistan*

<sup>g</sup>*Department of Chemistry, College of Sciences, Princess Nourah bint Abdulrahman University, P.O.Box 84428, Riyadh 11671, Saudi Arabia*

<sup>h</sup>*Department of Chemistry, Faculty of Science, Assiut University, 71516 Assiut, Egypt*

<sup>i</sup>*Department of Pharmacy, University of Malakand, Chakdara Dir, Khyber Pakhtunkhwa, Pakistan*

---

\*Correspondence may be addressed to: Ehsan Ullah Mughal, Amina Sadiq and Syed Wadood Ali Shah; E-mail address: [ehsan.ullah@uog.edu.pk](mailto:ehsan.ullah@uog.edu.pk), [amina.sadiq@gcwus.edu.pk](mailto:amina.sadiq@gcwus.edu.pk), [wadudalishah@yahoo.com](mailto:wadudalishah@yahoo.com)

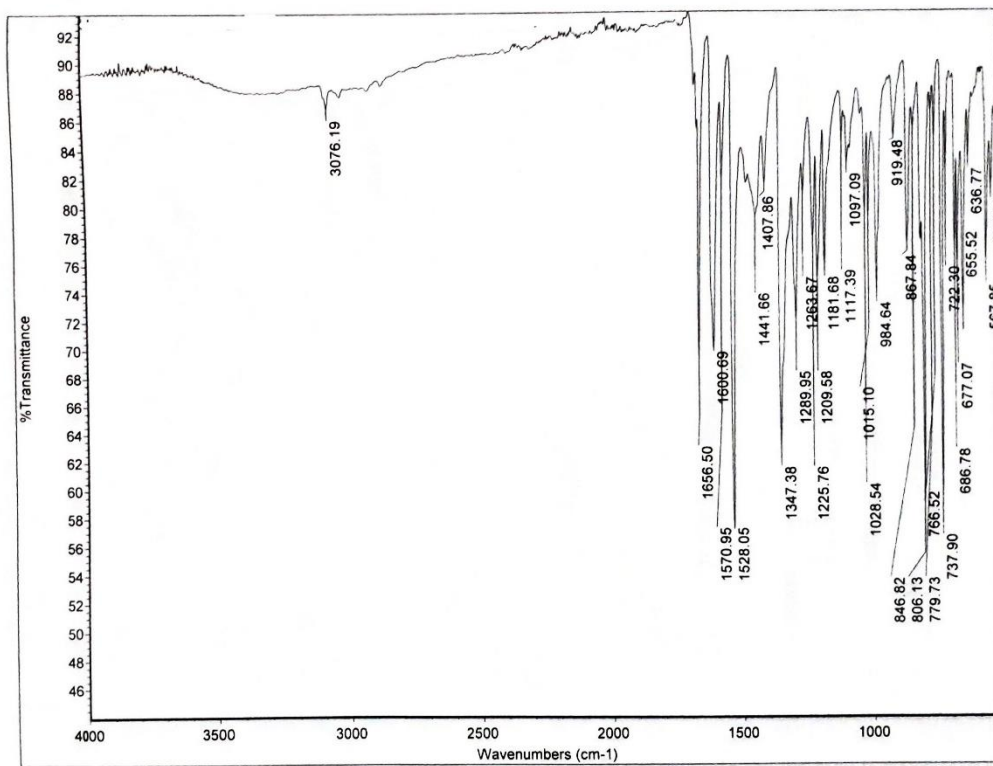

Figure S1. FTIR Spectrum of Compound 4C

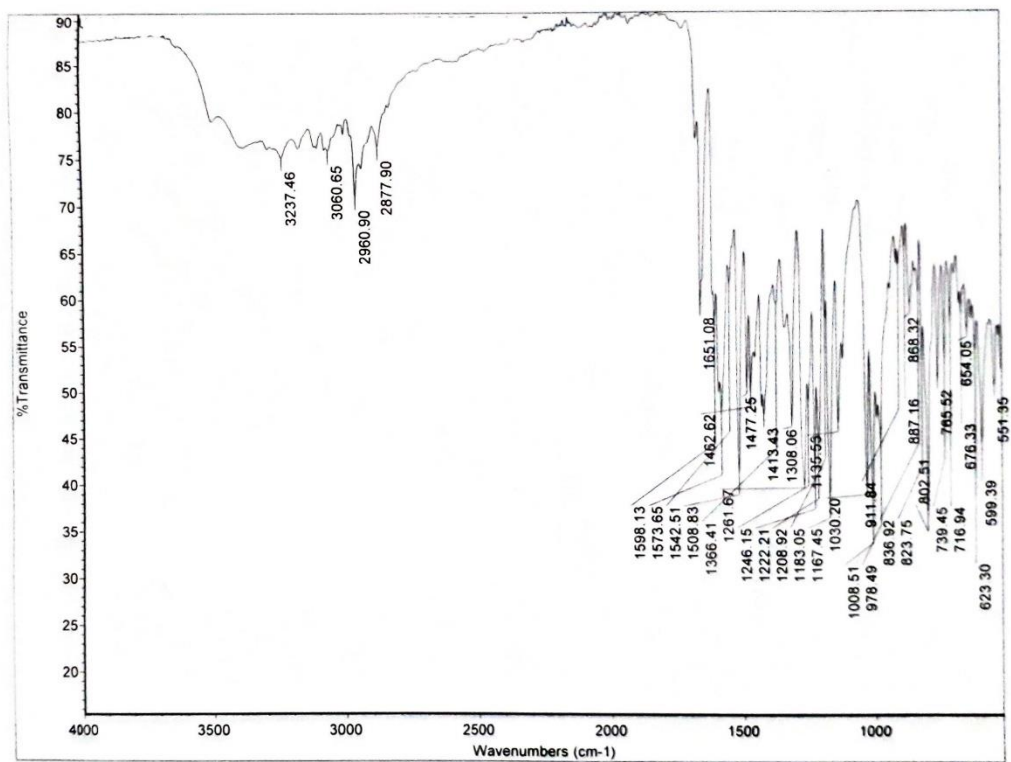

Figure S2. FTIR Spectrum of Compound 5C

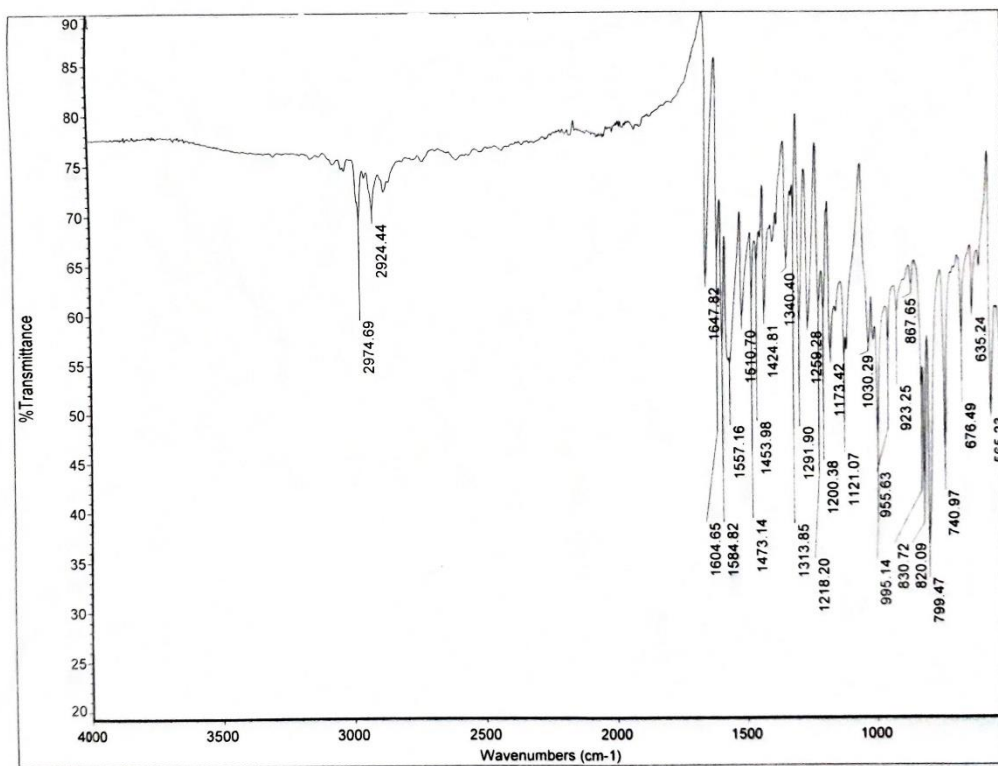

Figure S3. FTIR Spectrum of Compound 9C

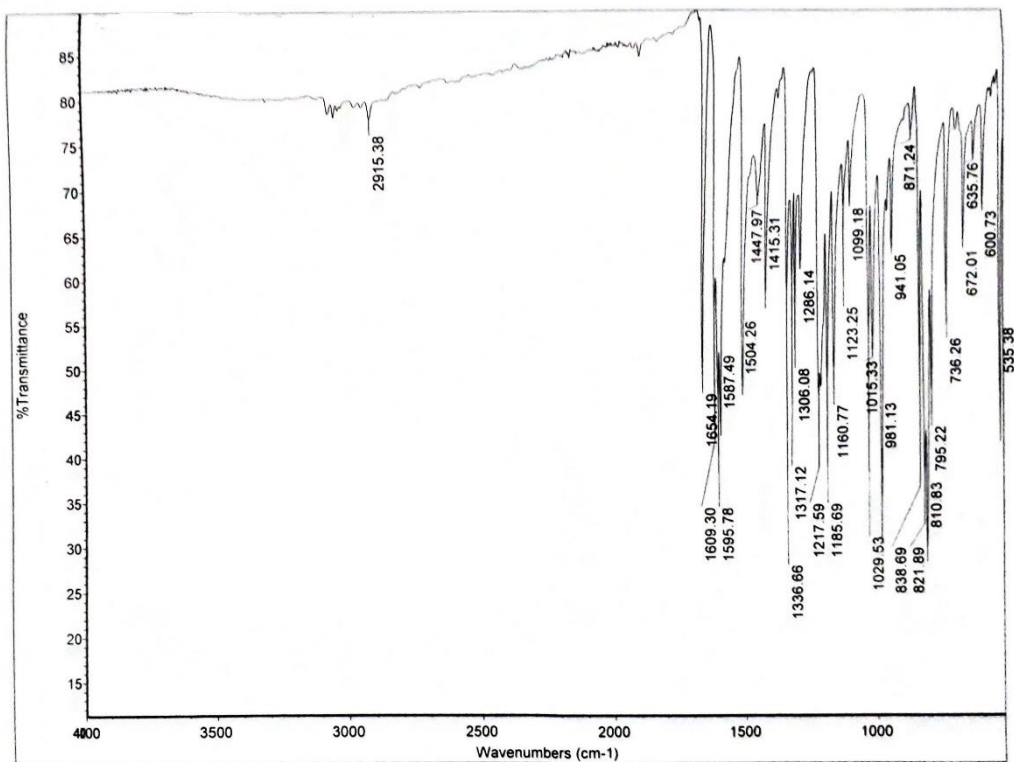

**Figure S4. FTIR Spectrum of Compound 12C**

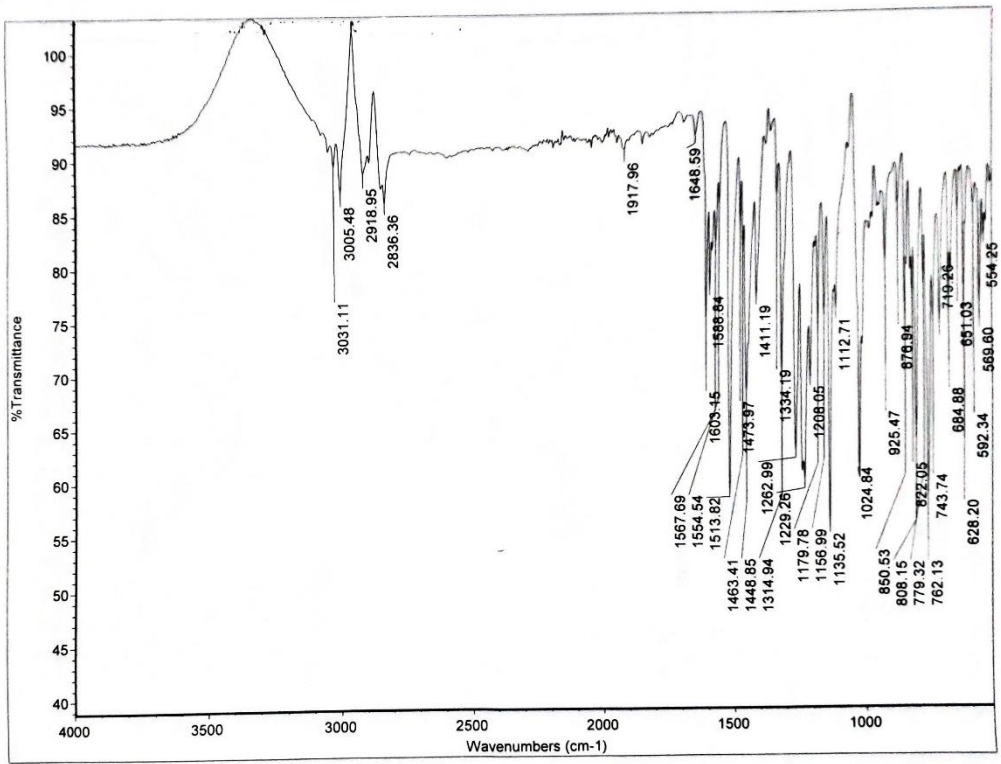

Figure S5. FTIR Spectrum of Compound 4B

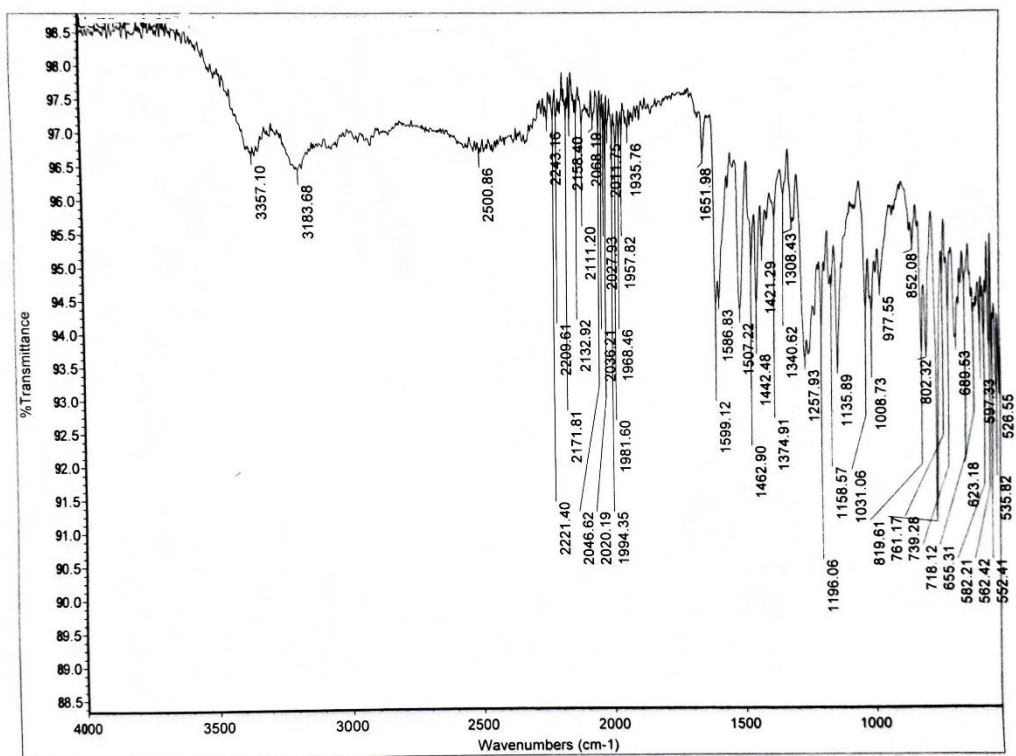

Figure S6. FTIR Spectrum of Compound 5B

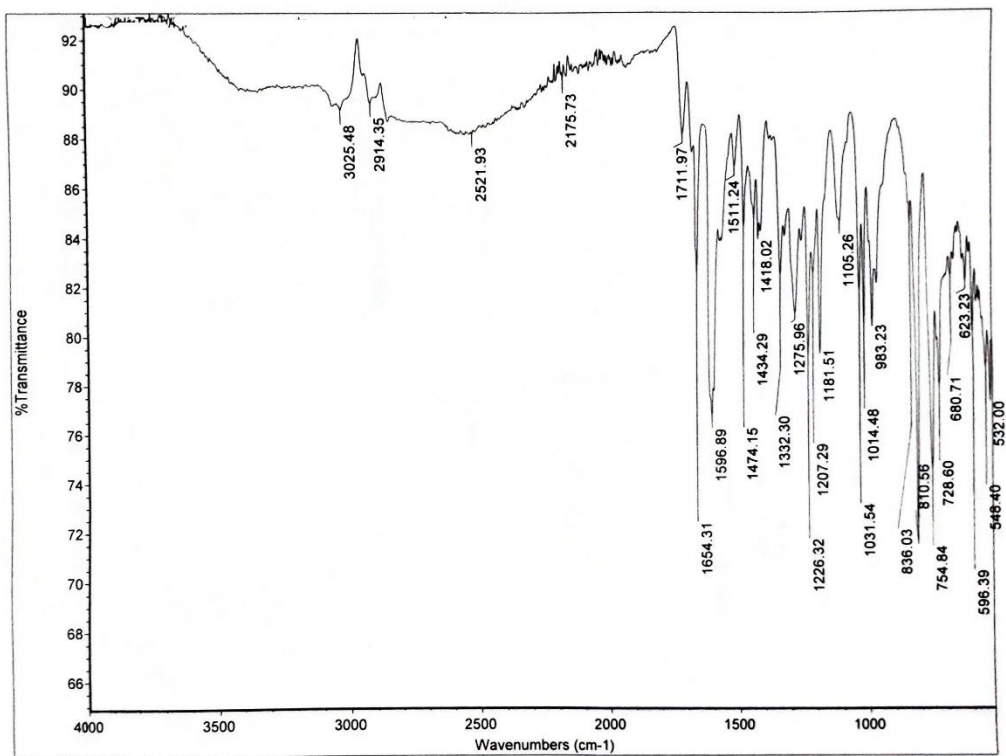

**Figure S7. FTIR Spectrum of Compound 6B**



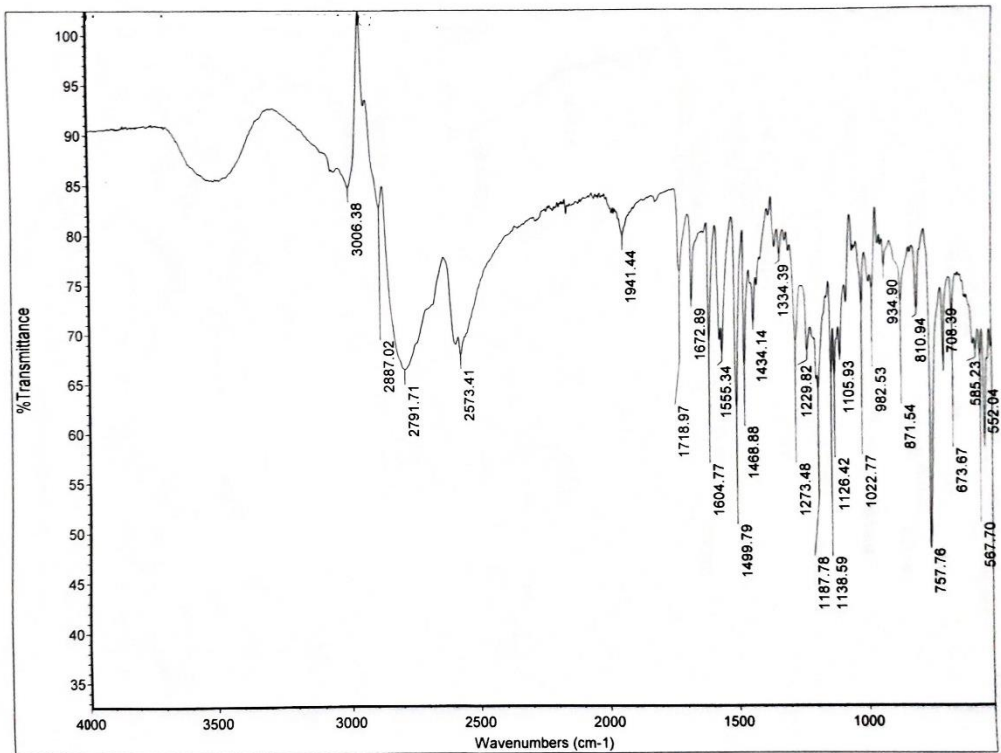

Figure S8. FTIR Spectrum of Compound 7B

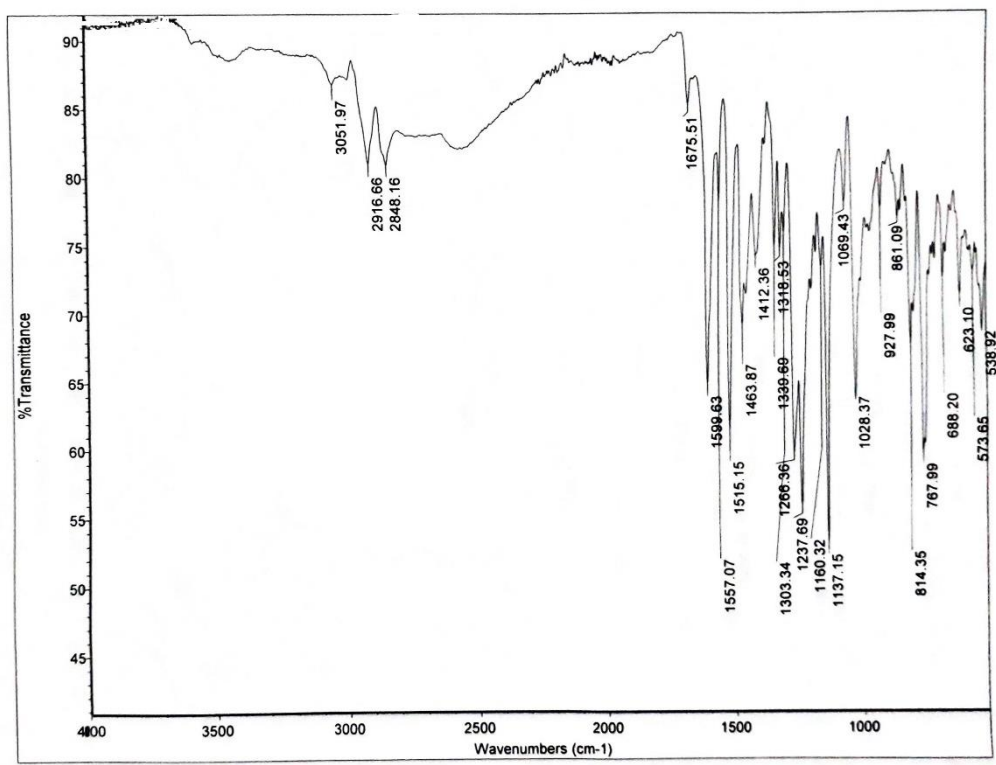

**Figure S9. FTIR Spectrum of Compound 8B**

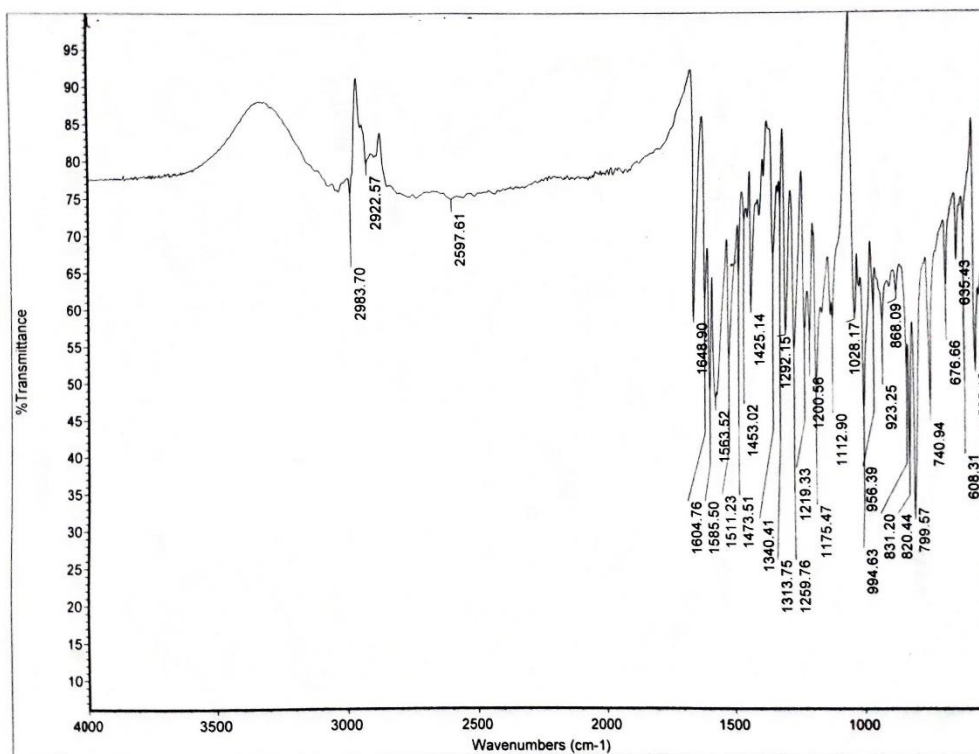

**Figure S10. FTIR Spectrum of Compound 9B**

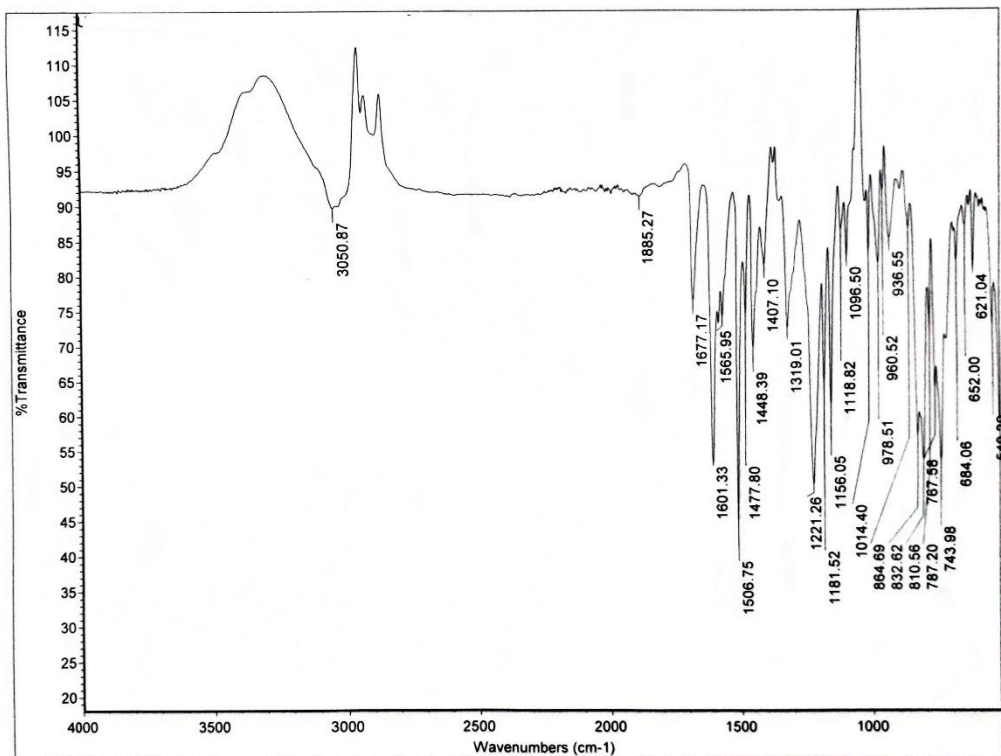

Figure S11. FTIR Spectrum of Compound 12B

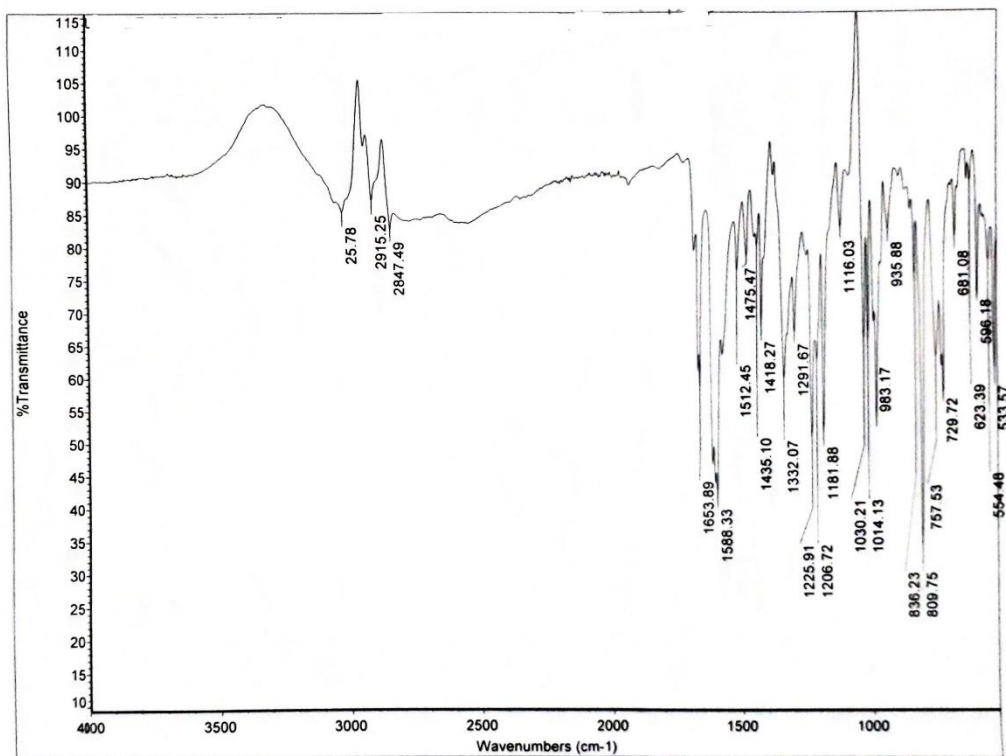

**Figure S12. FTIR Spectrum of Compound 13B**

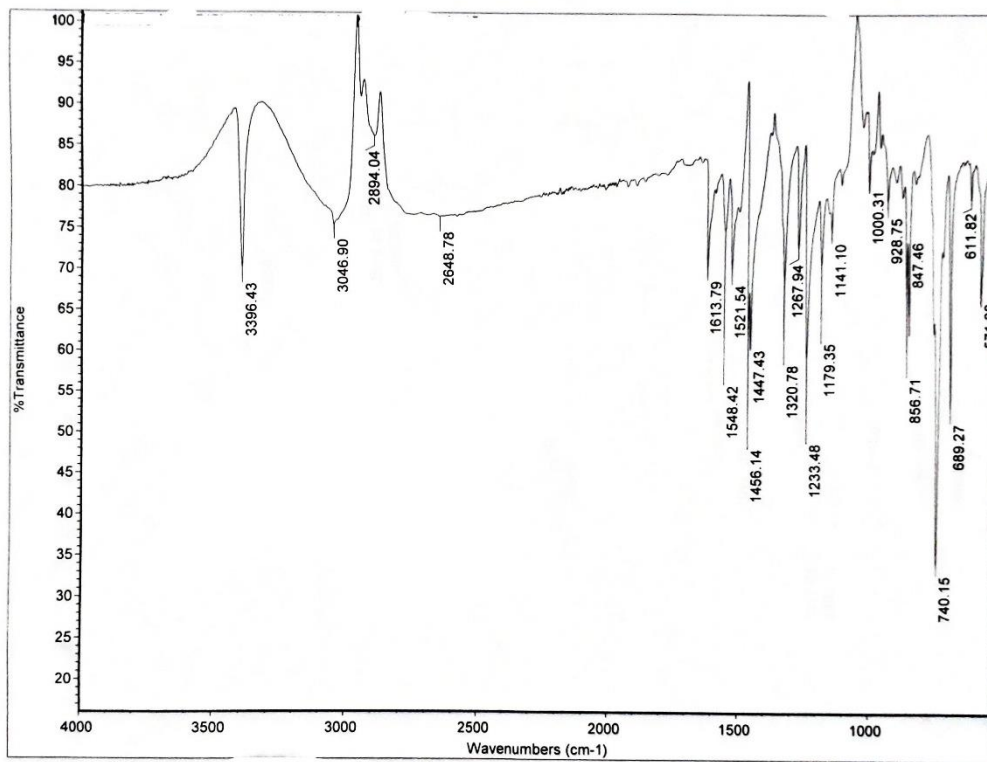

**Figure S13. FTIR Spectrum of Compound 14B**

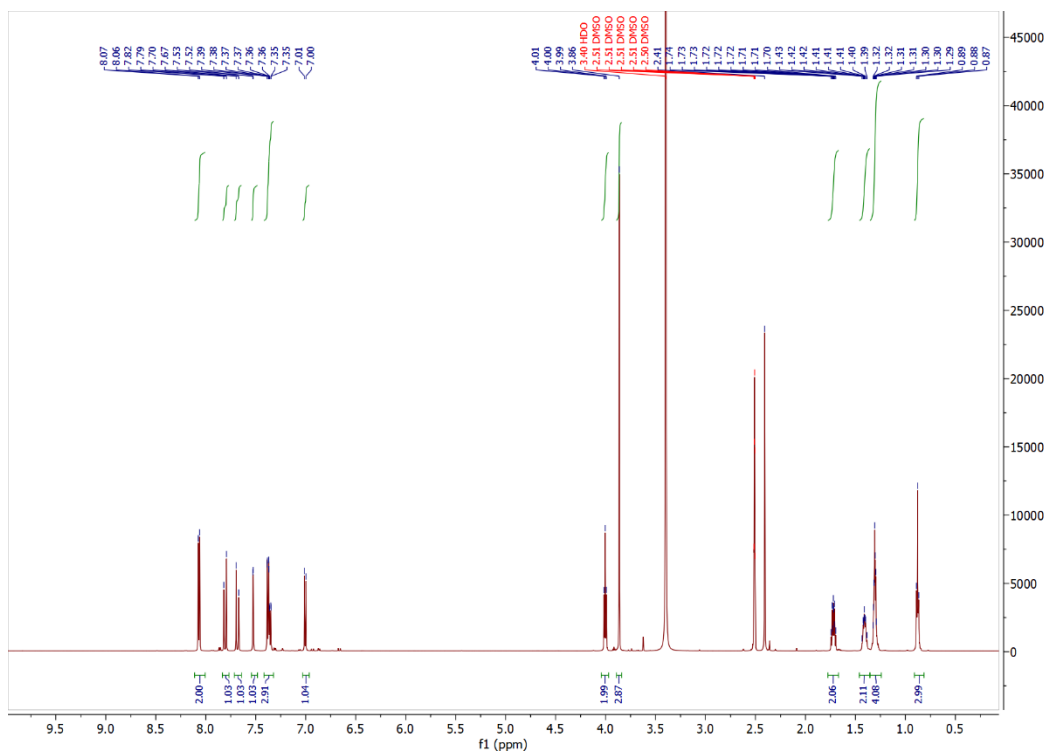

**Figure S14. <sup>1</sup>H-NMR Spectrum of Compound (4C)**

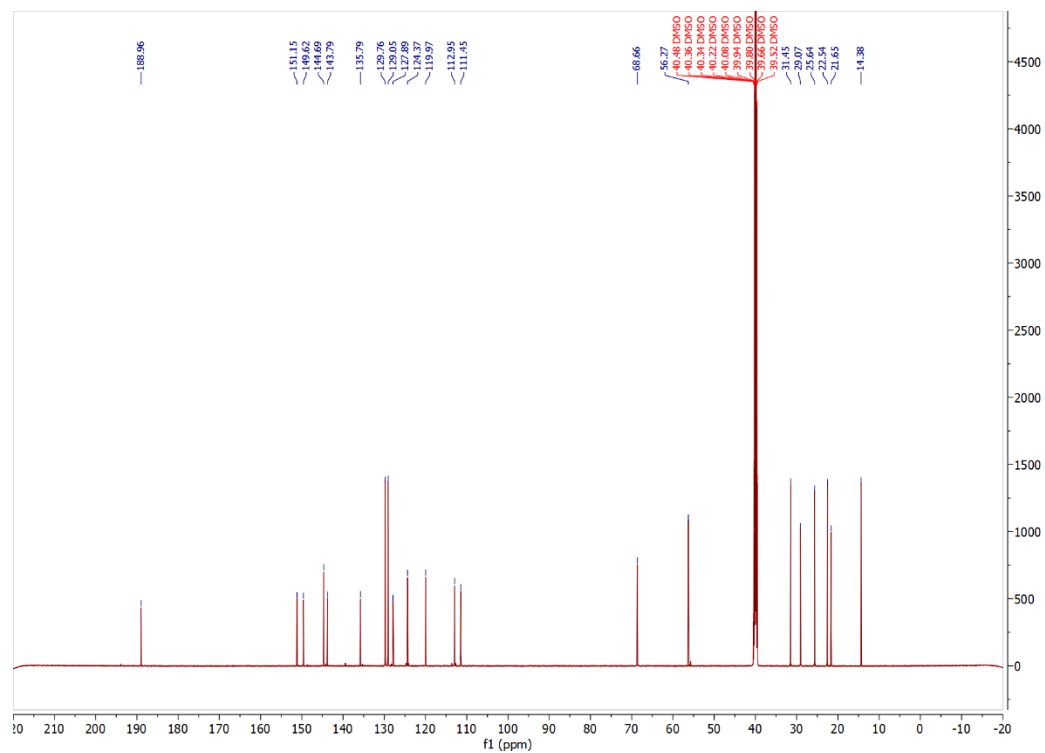

**Figure S15.**  $^{13}\text{C}$ -NMR Spectrum of Compound (4C)



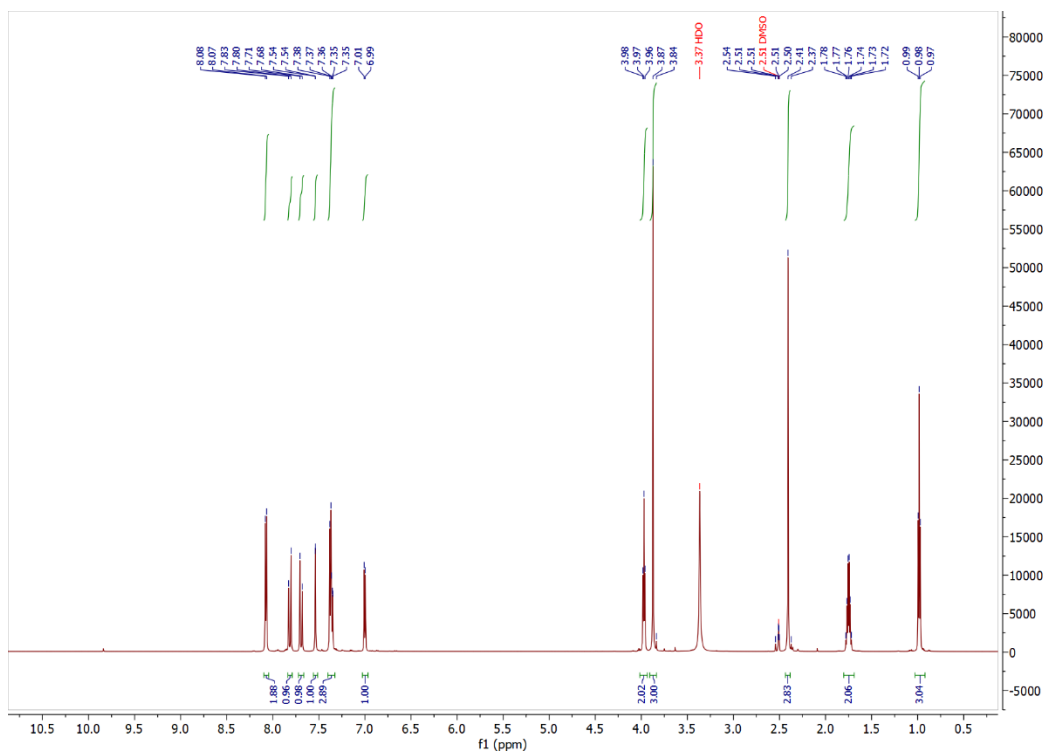

**Figure S16. <sup>1</sup>H-NMR Spectrum of Compound (5C)**

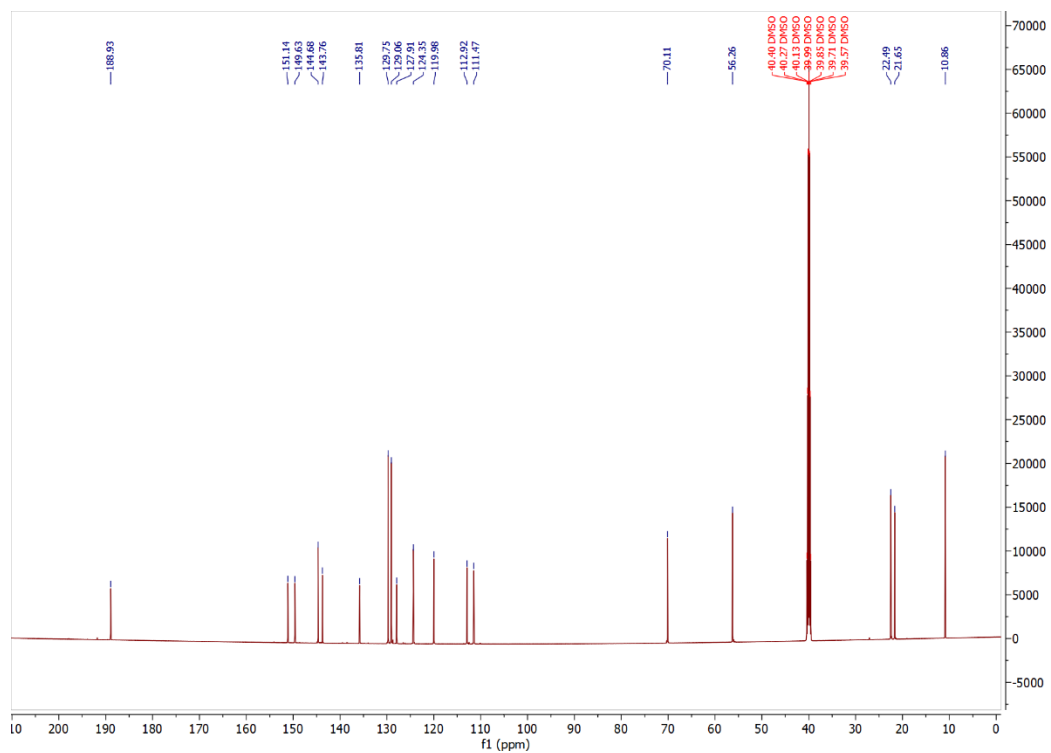

Figure S17. <sup>13</sup>C-NMR Spectrum of Compound (5C)



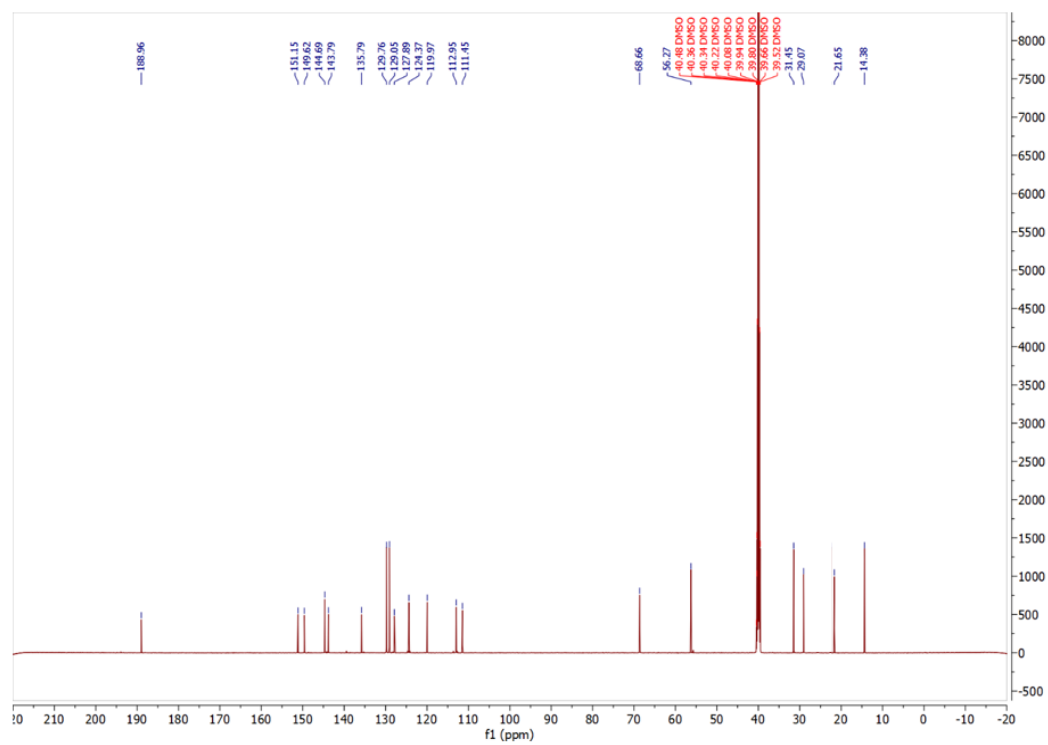

Figure S19.  $^{13}\text{C}$ -NMR Spectrum of Compound (9C)

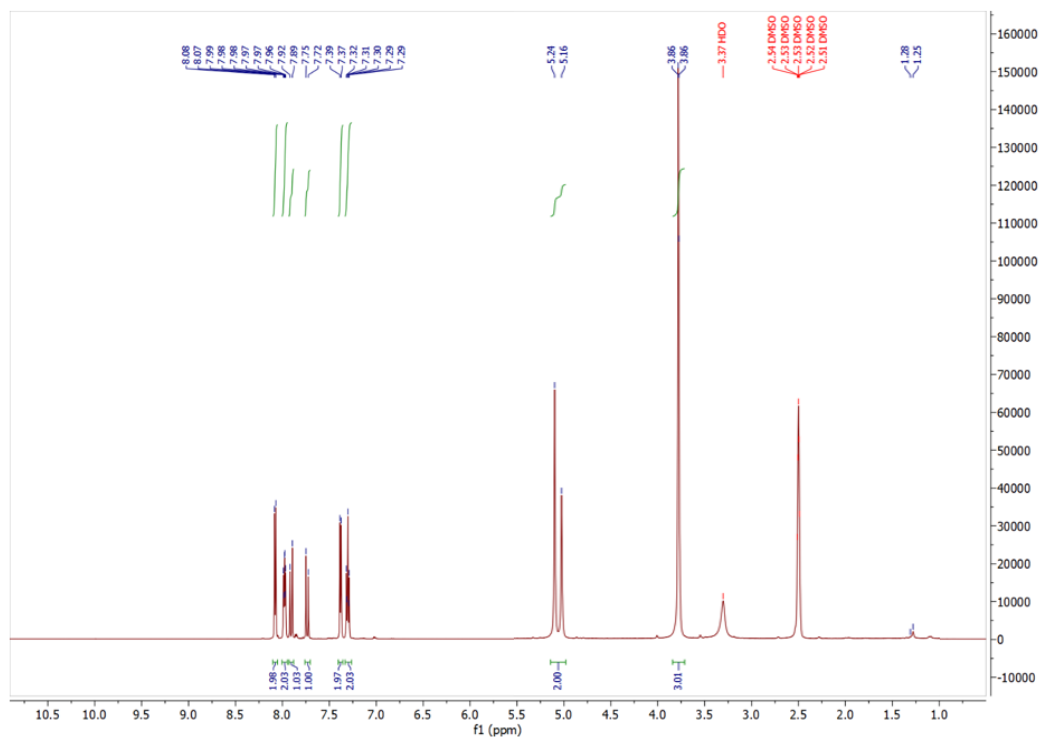

Figure S20. <sup>1</sup>H-NMR Spectrum of Compound (12C)

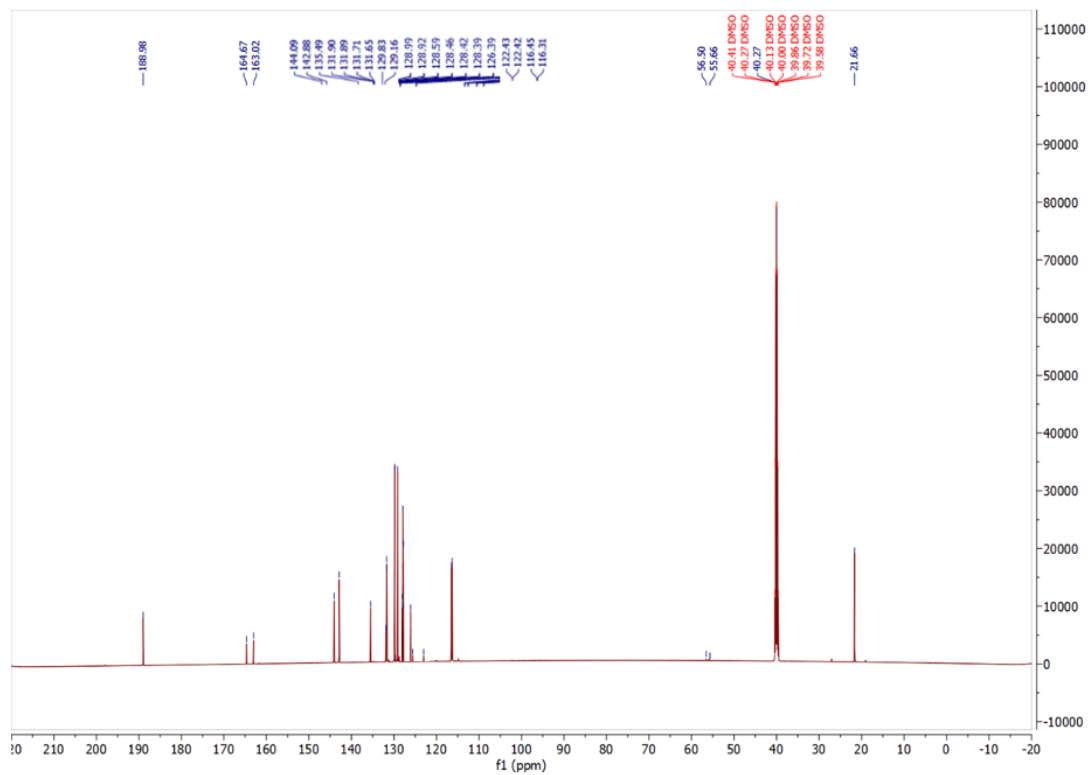

Figure S21. <sup>13</sup>C-NMR Spectrum of Compound (12C)

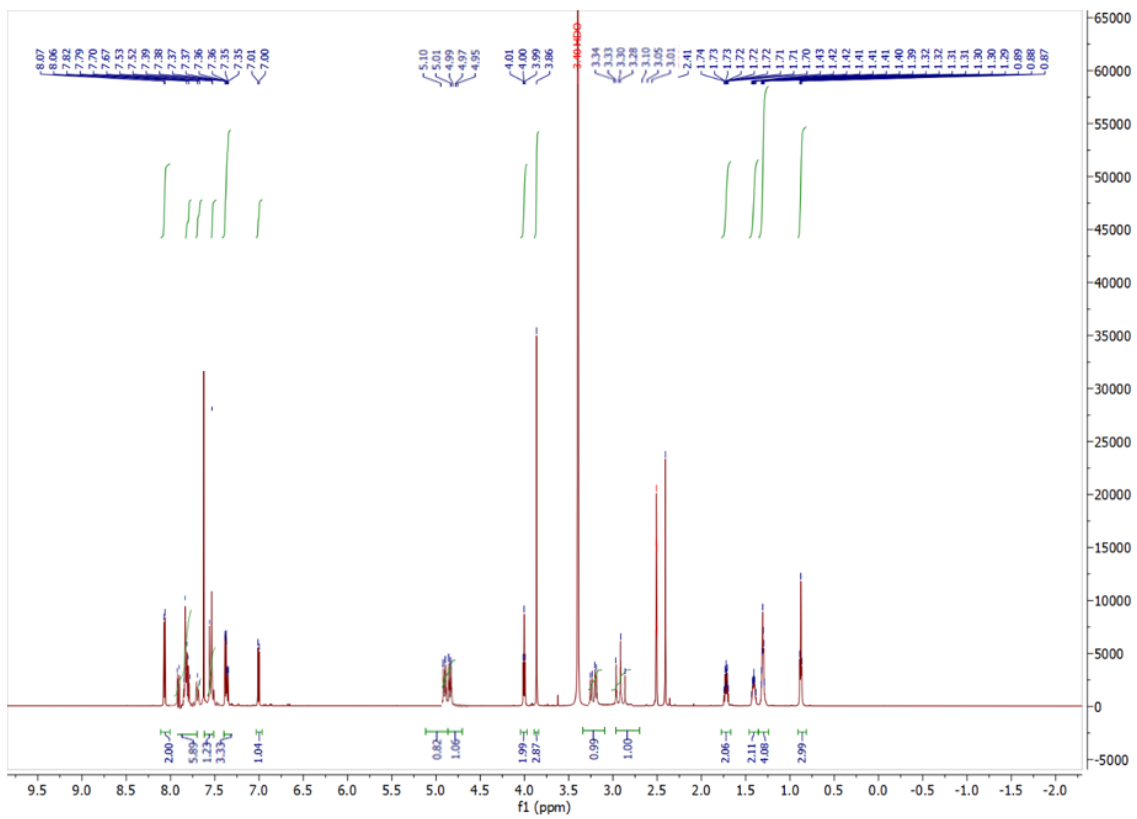

Figure S22. <sup>1</sup>H-NMR Spectrum of Compound (4B)

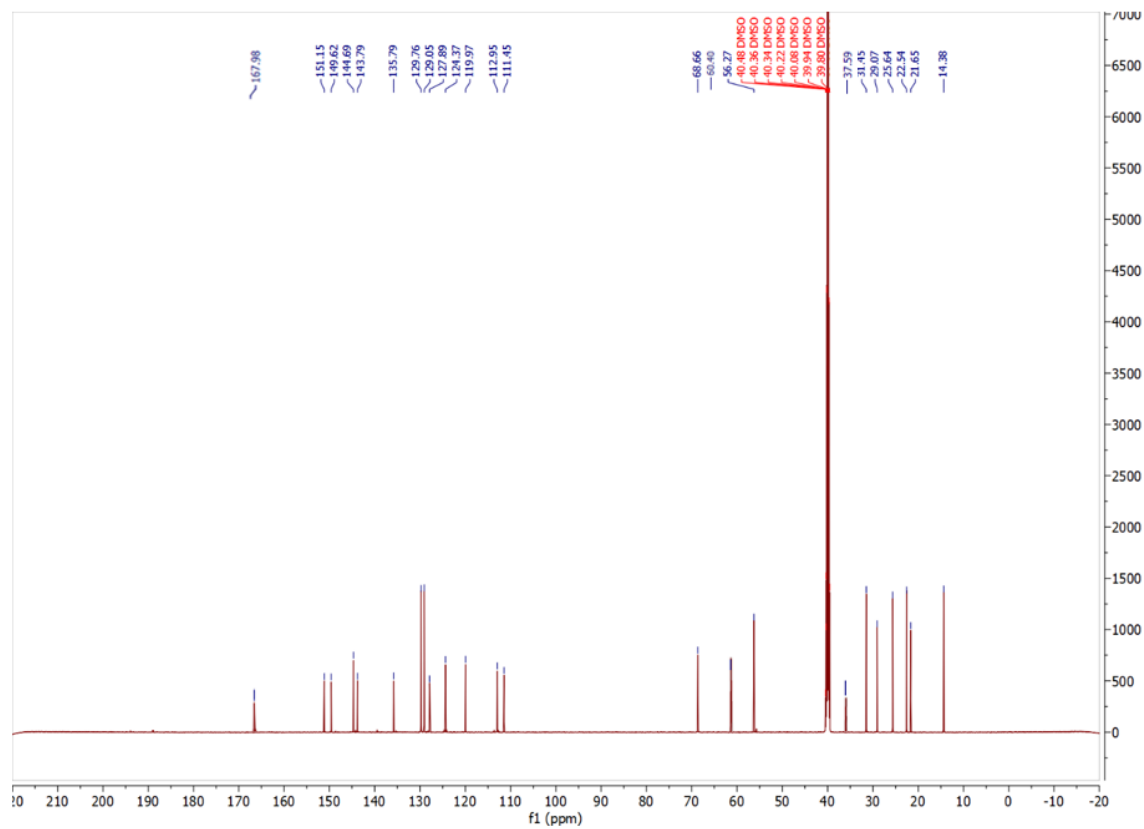

**Figure S23.**  $^{13}\text{C}$ -NMR Spectrum of Compound (4B)



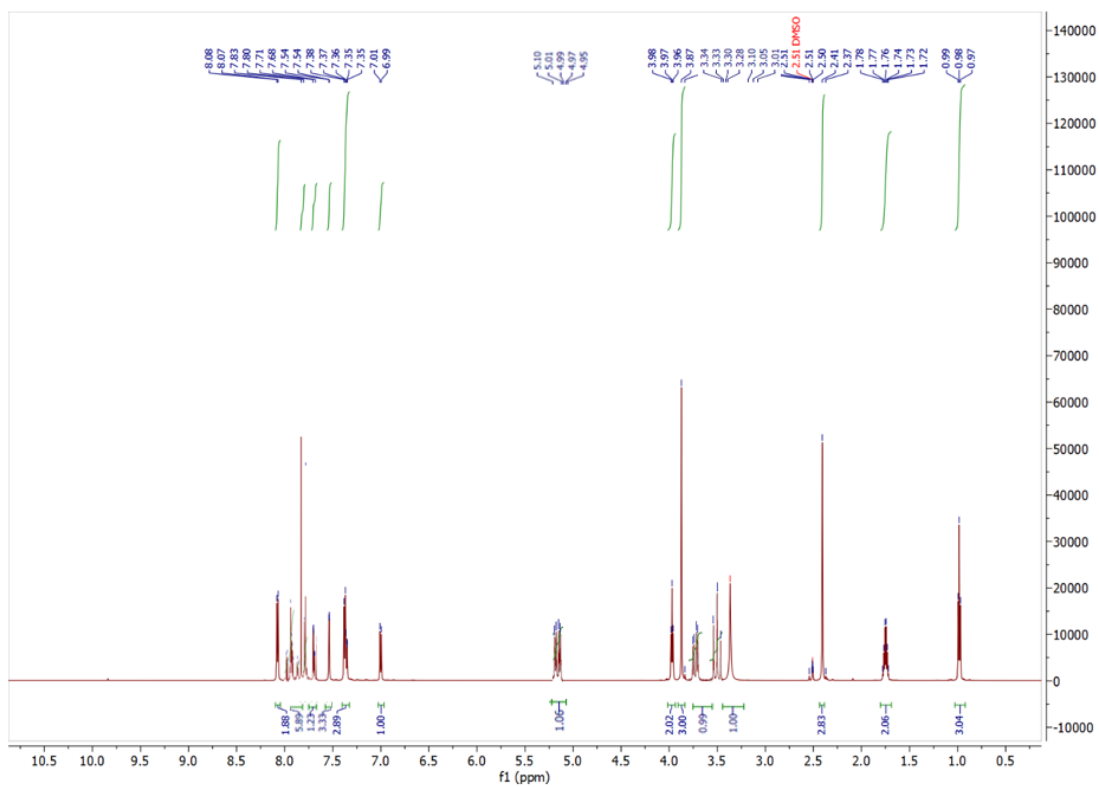

**Figure S24. <sup>1</sup>H-NMR Spectrum of Compound (5B)**

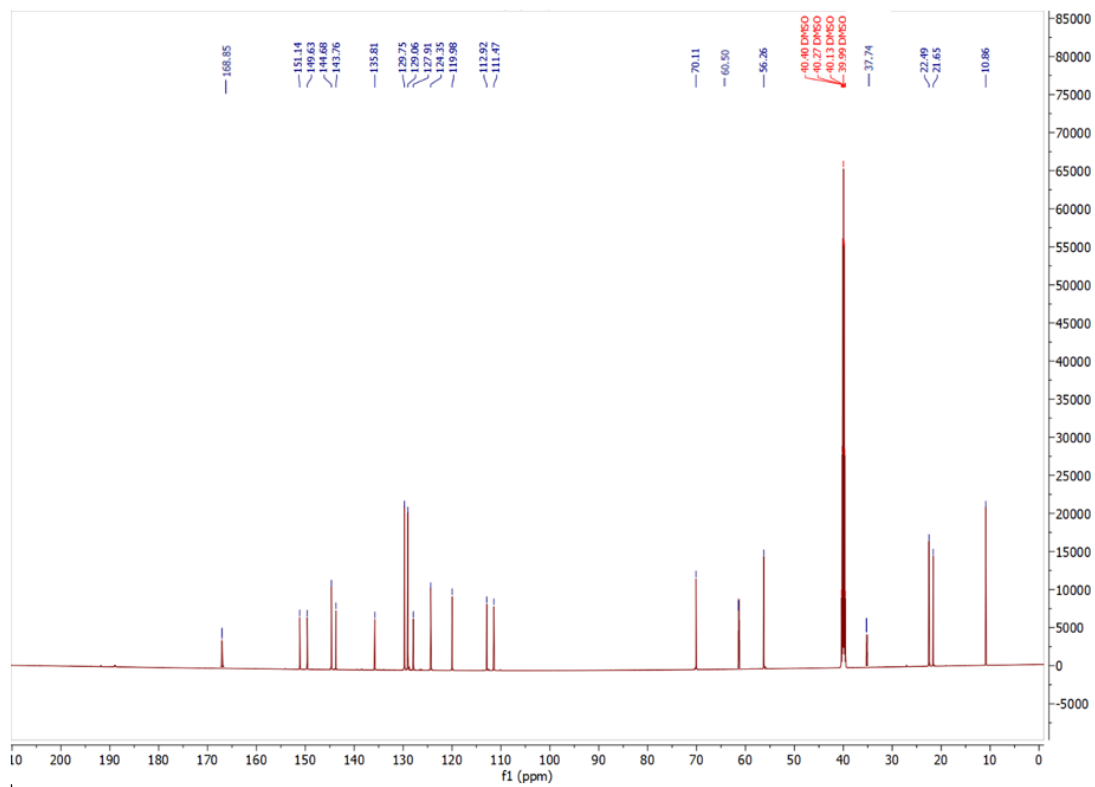

Figure S25.  $^{13}\text{C}$ -NMR Spectrum of Compound (5B)

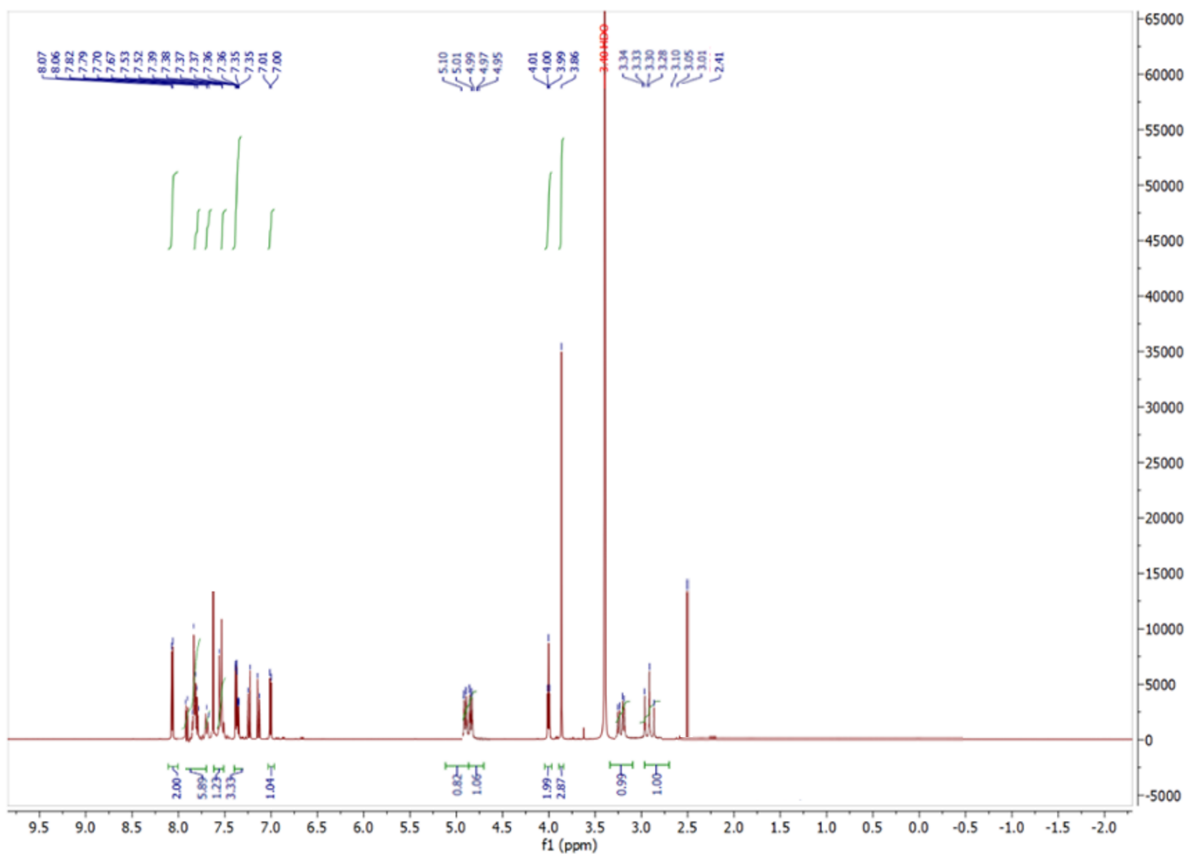

Figure S26. <sup>1</sup>H-NMR Spectrum of Compound (6B)

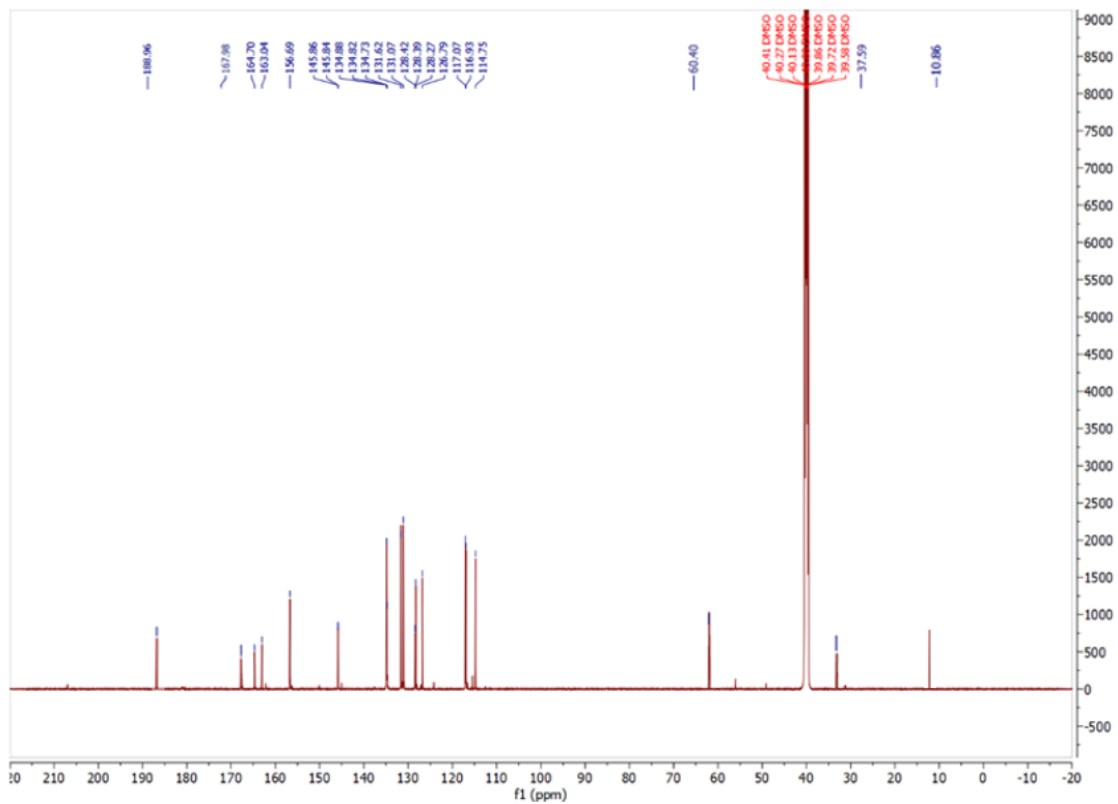

Figure S27. <sup>13</sup>C-NMR Spectrum of Compound (6B)

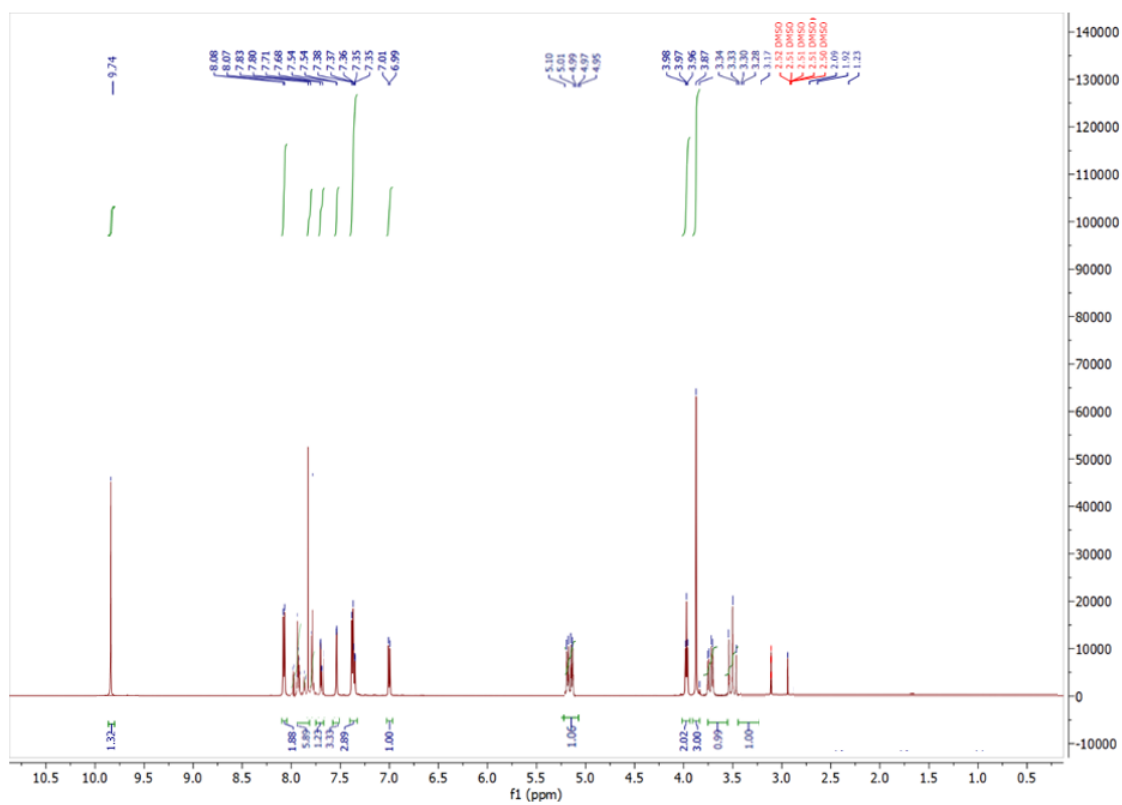

**Figure S28. <sup>1</sup>H-NMR Spectrum of Compound (7B)**

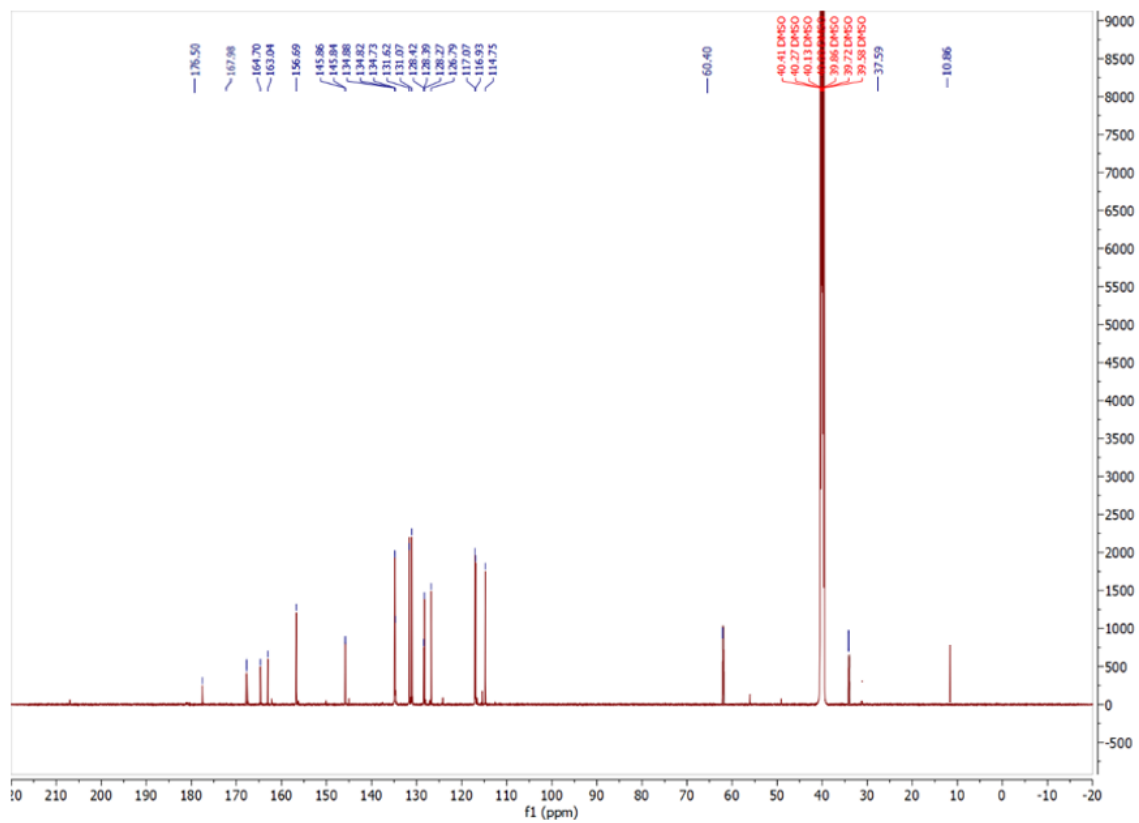

Figure S29. <sup>13</sup>C-NMR Spectrum of Compound (7B)

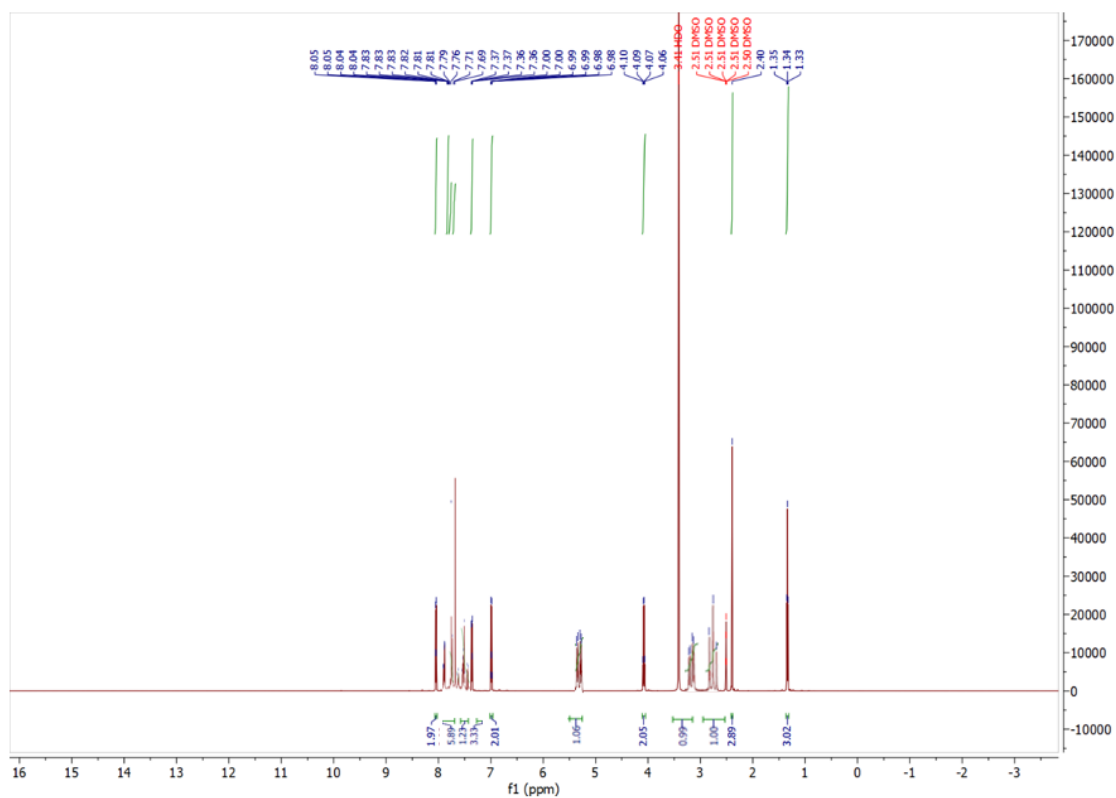

Figure S30. <sup>1</sup>H-NMR Spectrum of Compound (8B)

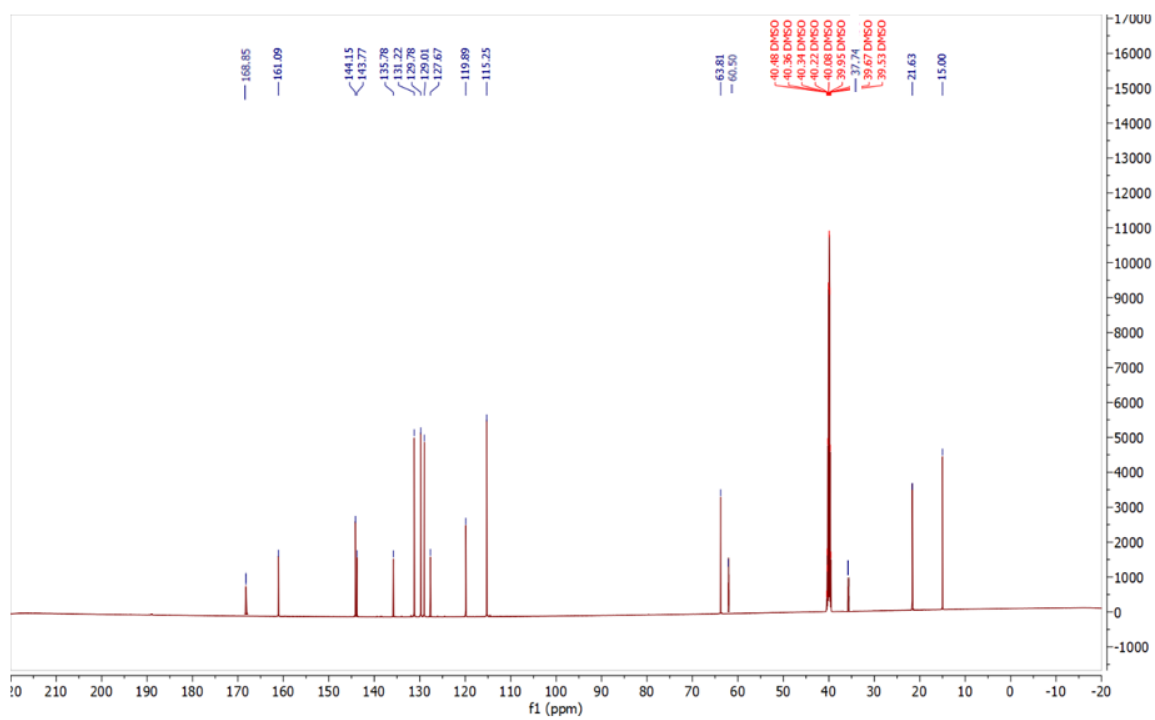

**Figure S31. <sup>13</sup>C-NMR Spectrum of Compound (8B)**



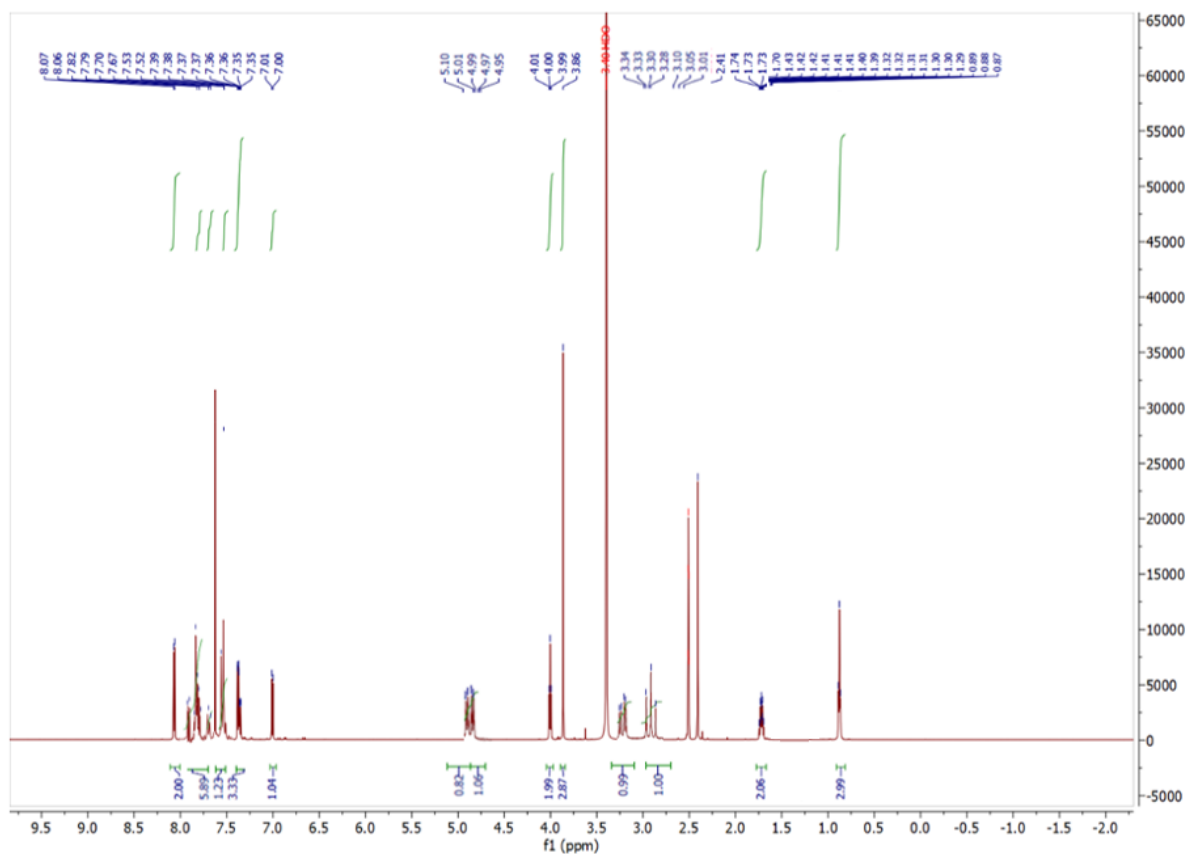

Figure S32. <sup>1</sup>H-NMR Spectrum of Compound (9B)

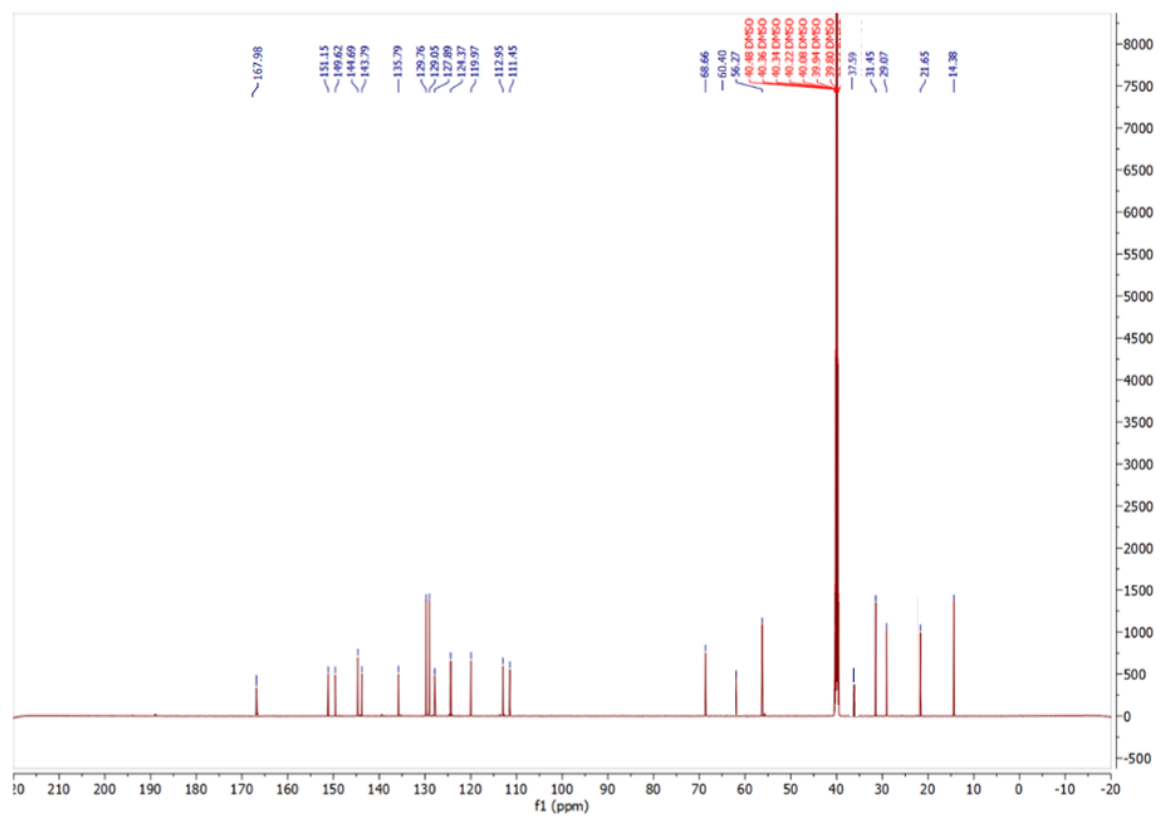

Figure S33. <sup>13</sup>C-NMR Spectrum of Compound (9B)

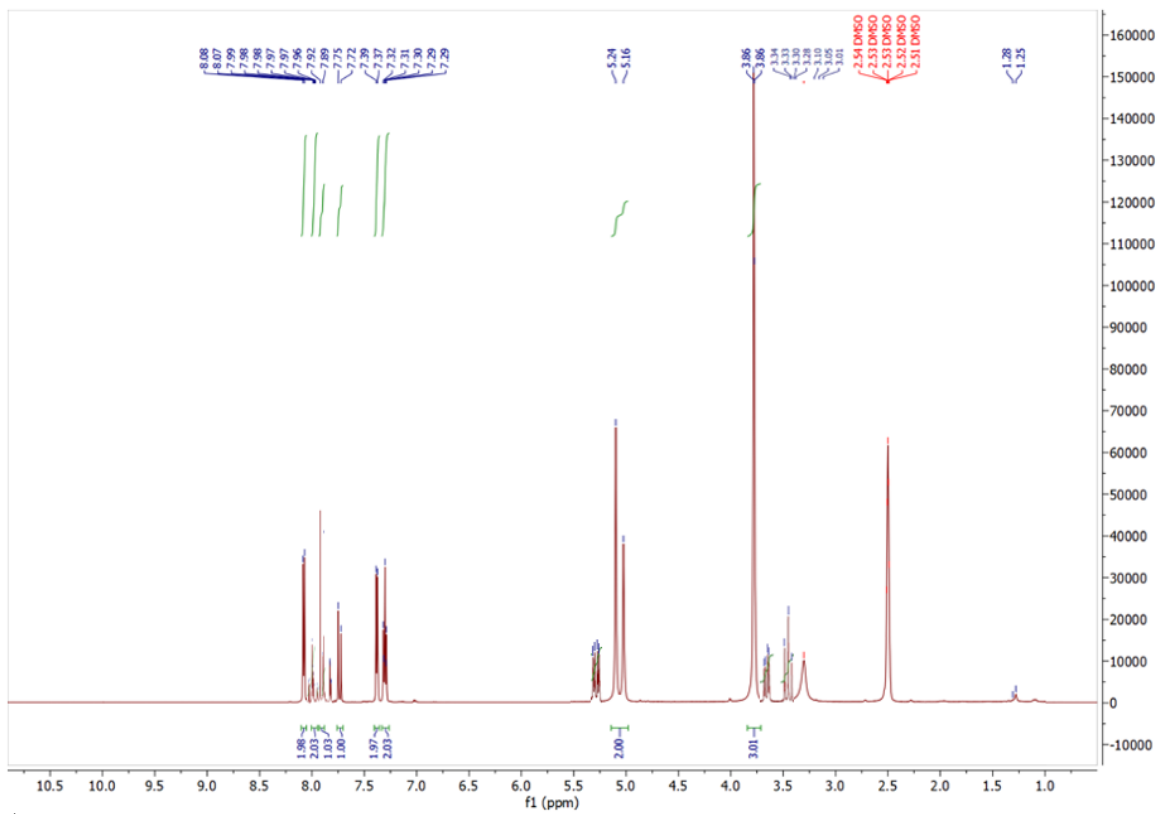

Figure S34. <sup>1</sup>H-NMR Spectrum of Compound (12B)

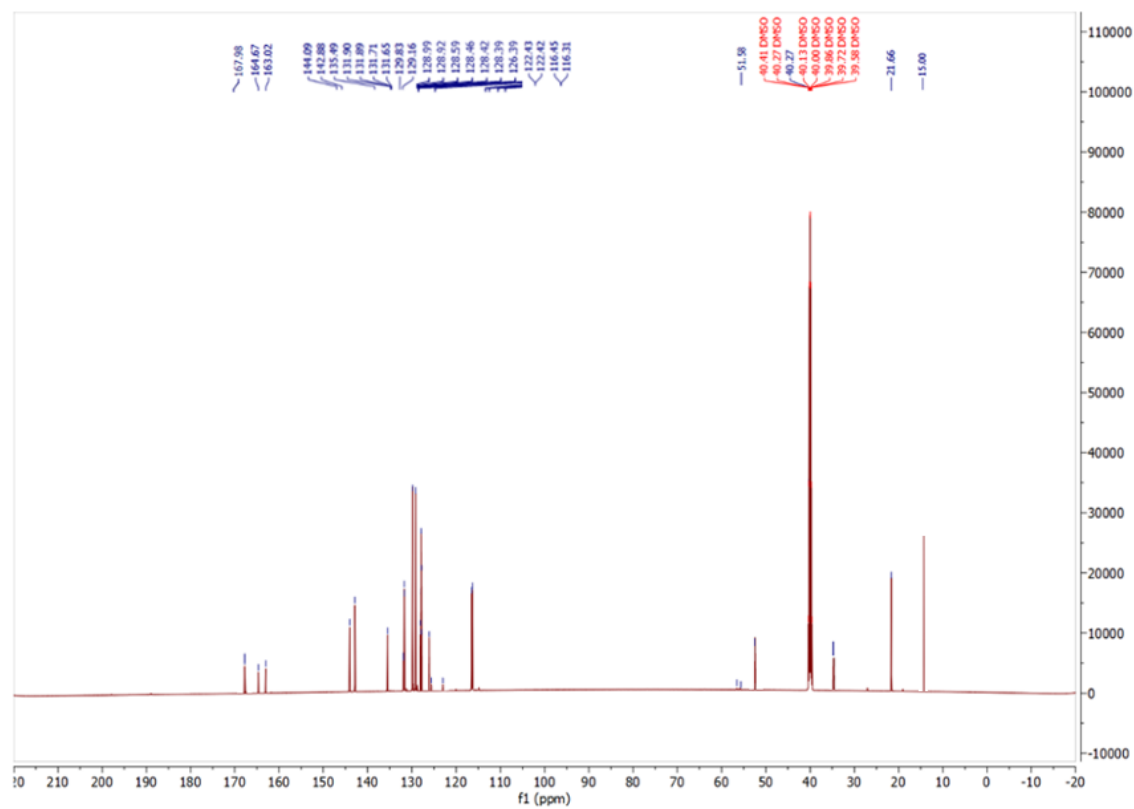

Figure S35.  $^{13}\text{C}$ -NMR Spectrum of Compound (12B)

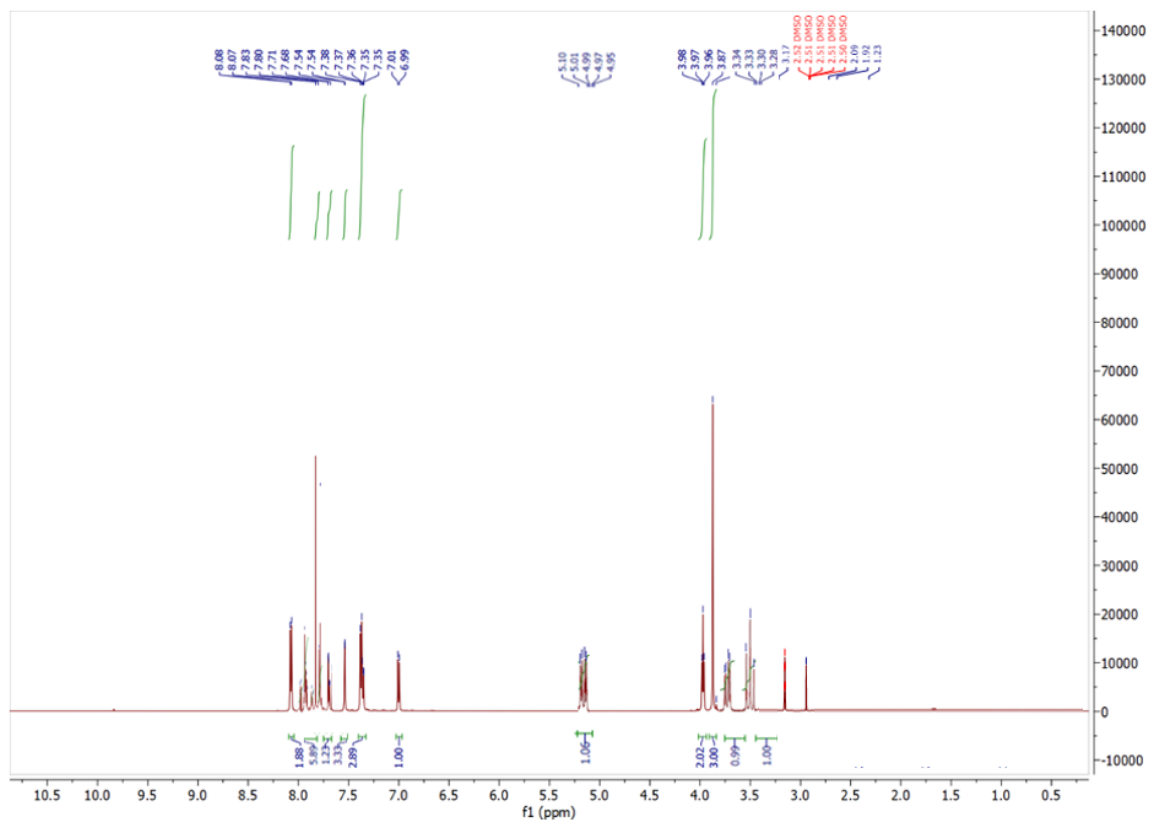

Figure S36. <sup>1</sup>H-NMR Spectrum of Compound (13B)

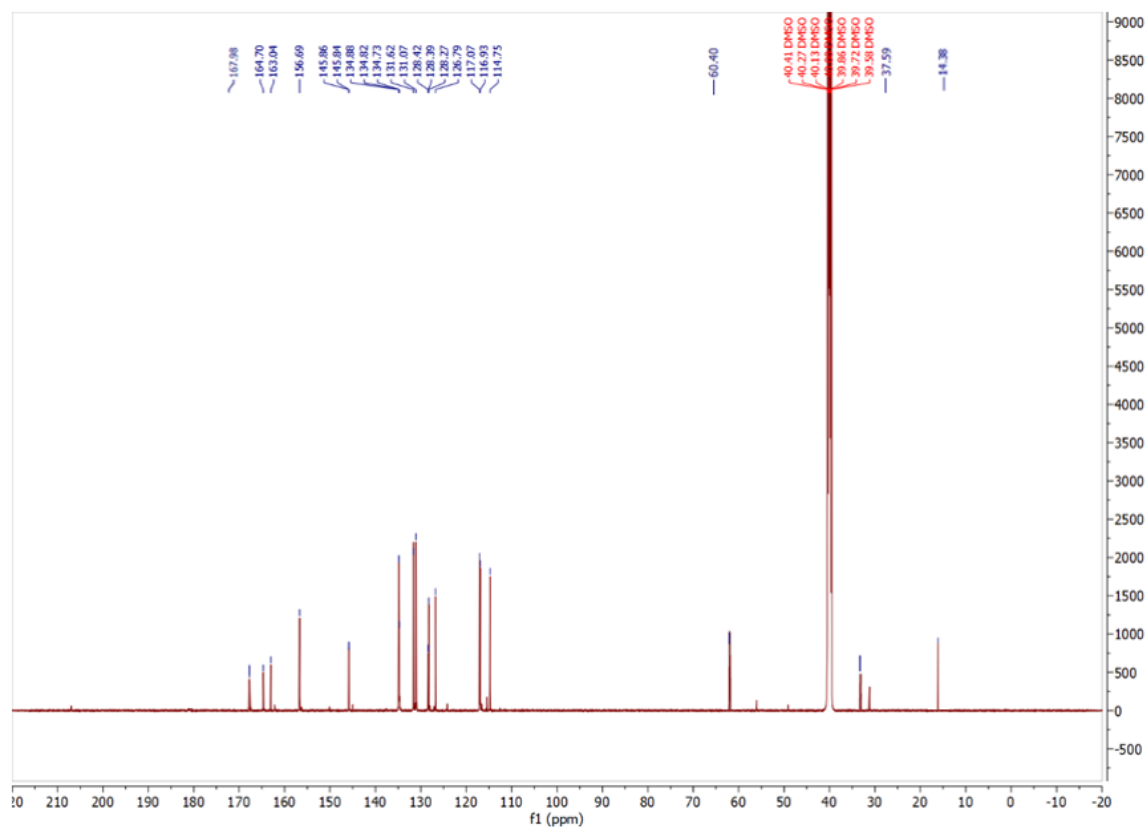

Figure S37.  $^{13}\text{C}$ -NMR Spectrum of Compound (13B)

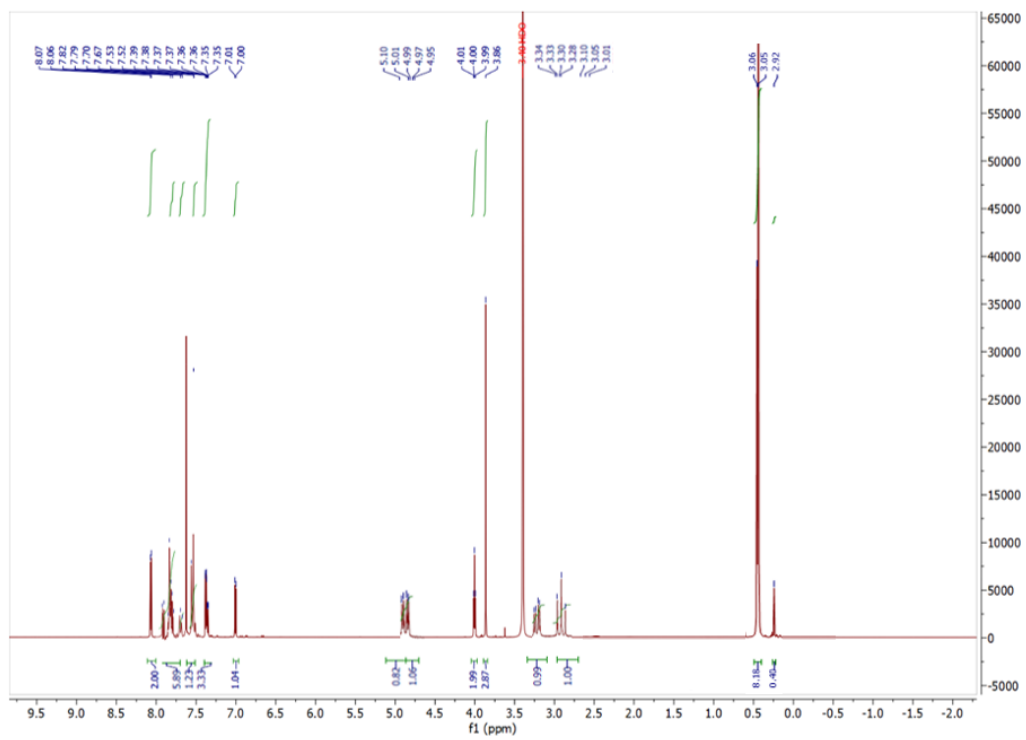

Figure S38. <sup>1</sup>H-NMR Spectrum of Compound (14B)

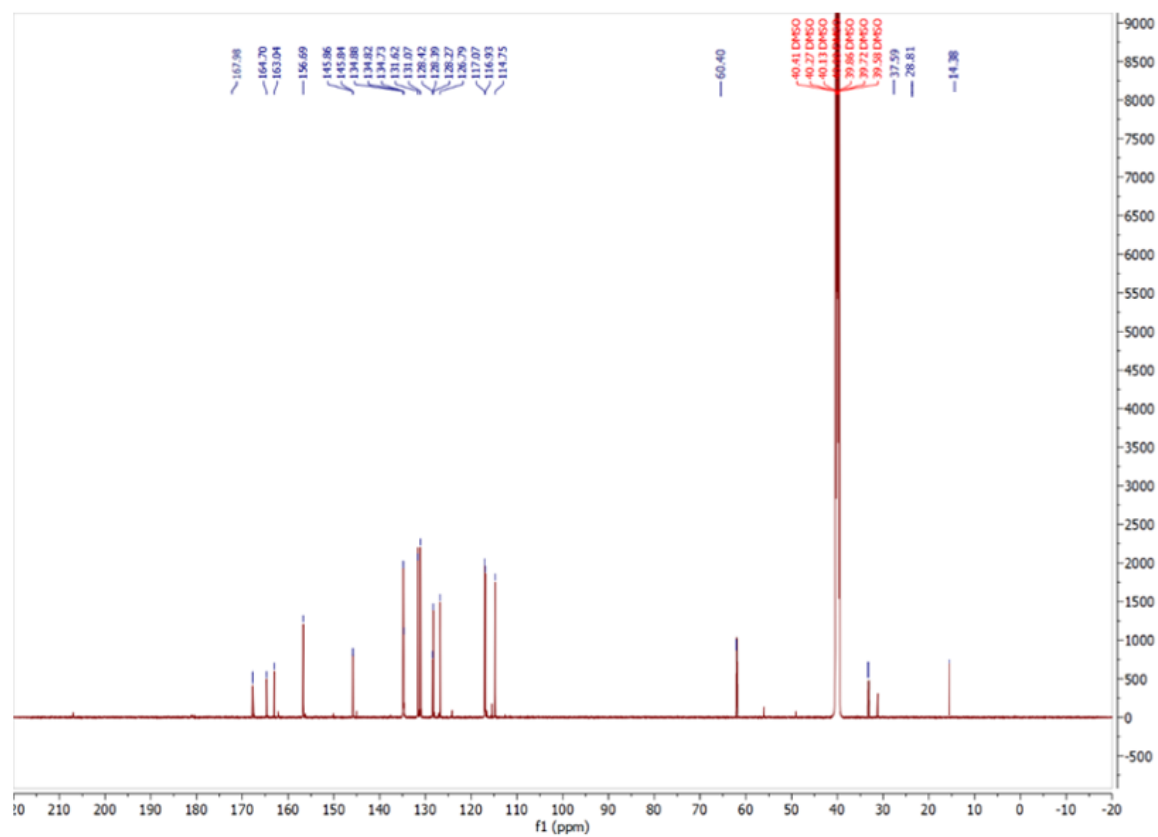

Figure S39.  $^{13}\text{C}$ -NMR Spectrum of Compound (14B)



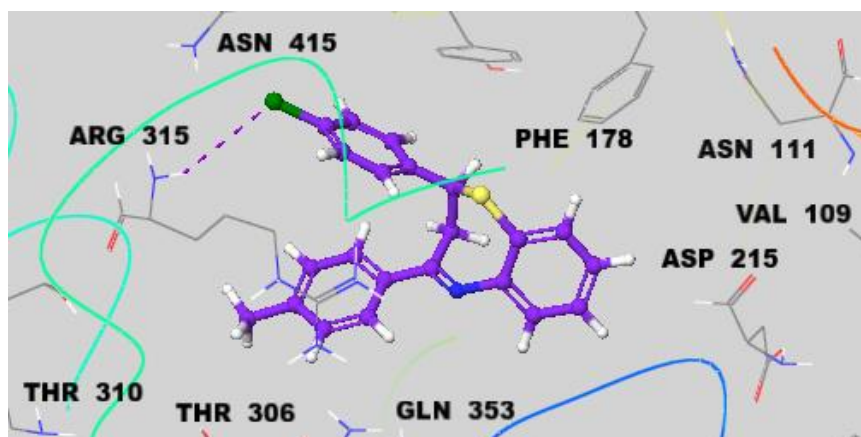

Figure S40. Docking Image of Compound 1B

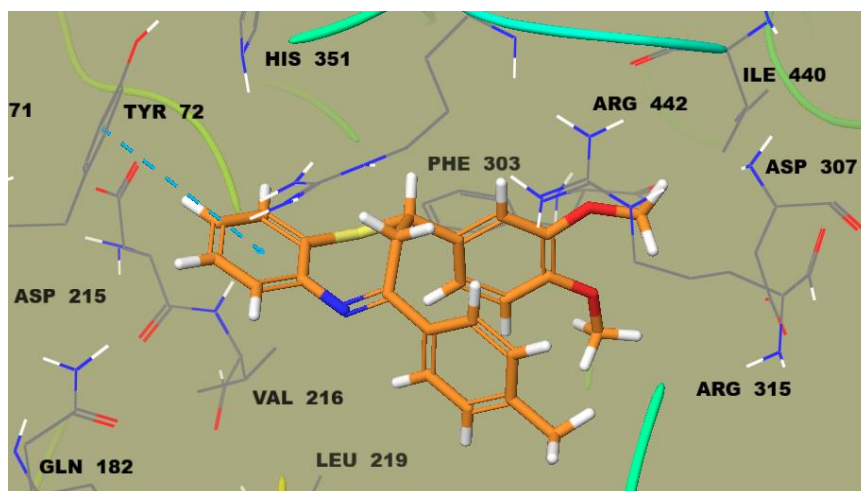

Figure S41. Docking Image of Compound 2B

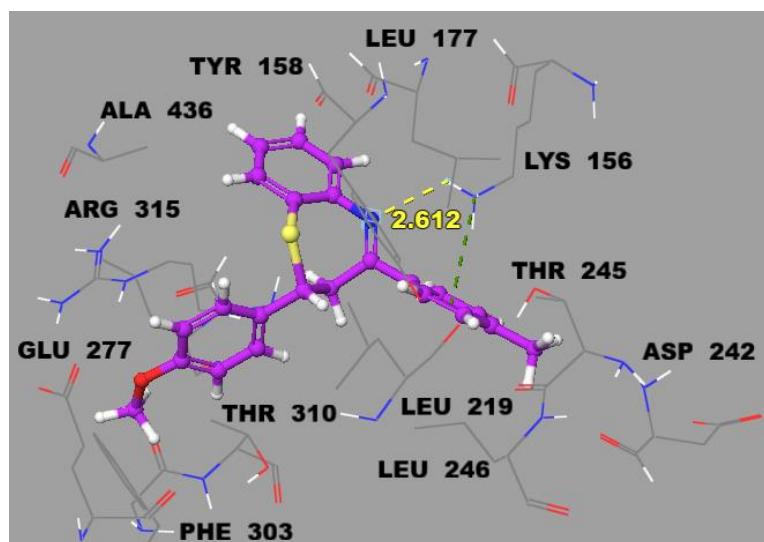

Figure S42. Docking Image of Compound 3B

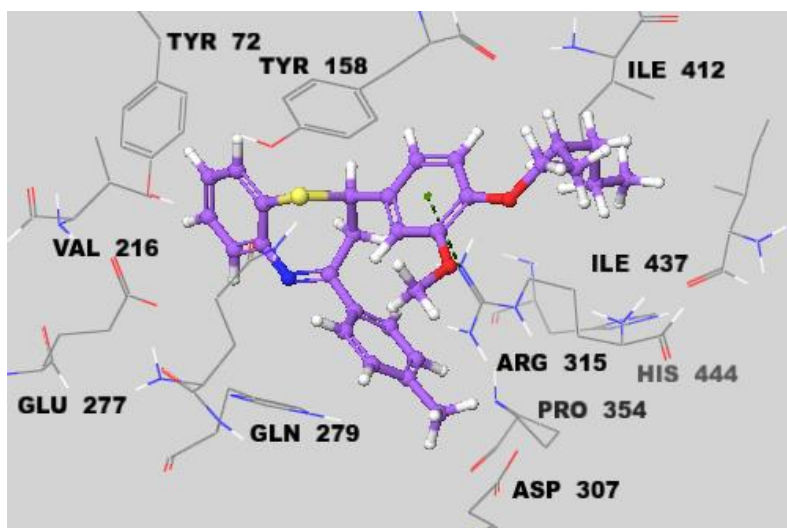

**Figure S43. Docking Image of Compound 4B**

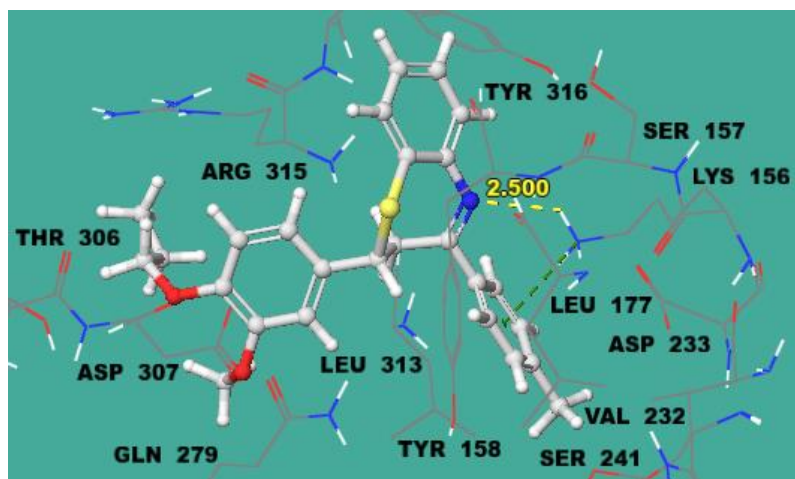

**Figure S44. Docking Image of Compound 5B**

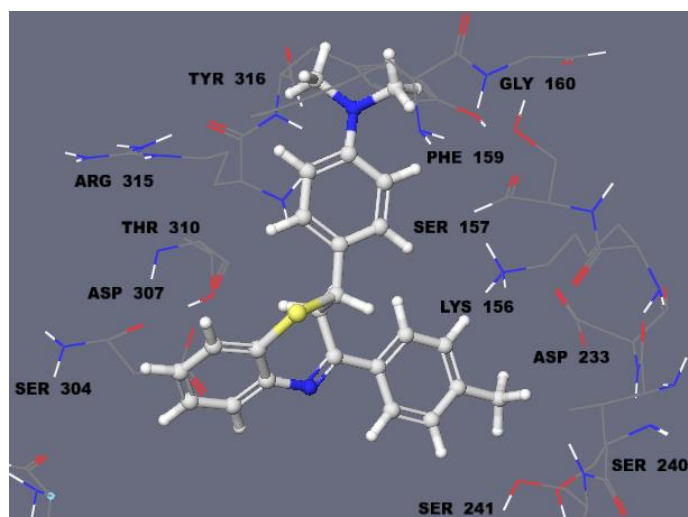

**Figure S45. Docking Image of Compound 6B**

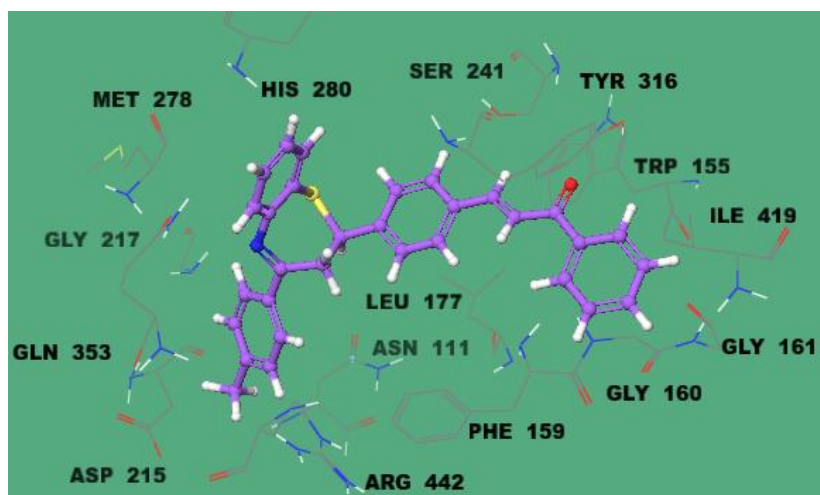

**Figure S46. Docking Image of Compound 7B**

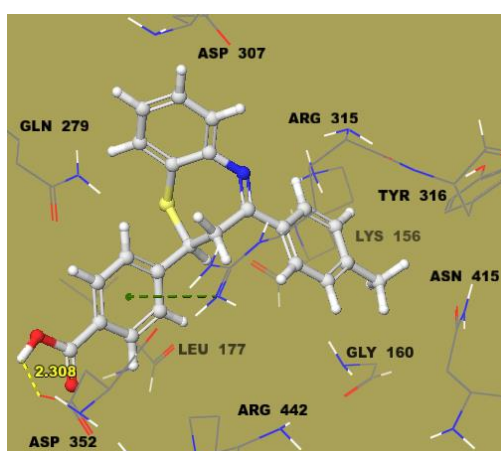

**Figure S47. Docking Image of Compound 8**

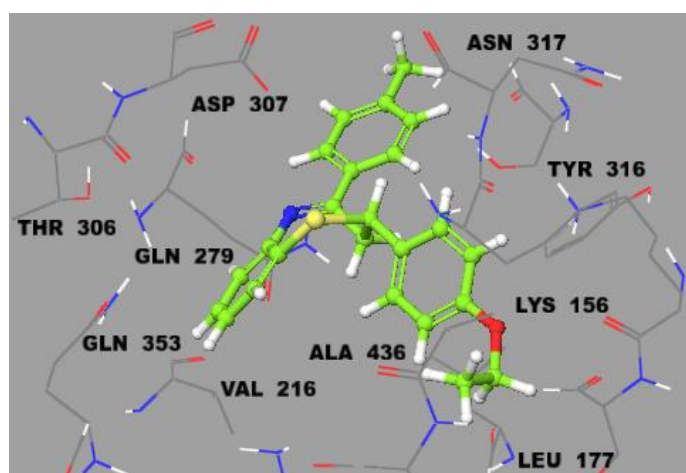

**Figure S48. Docking Image of Compound 9B**

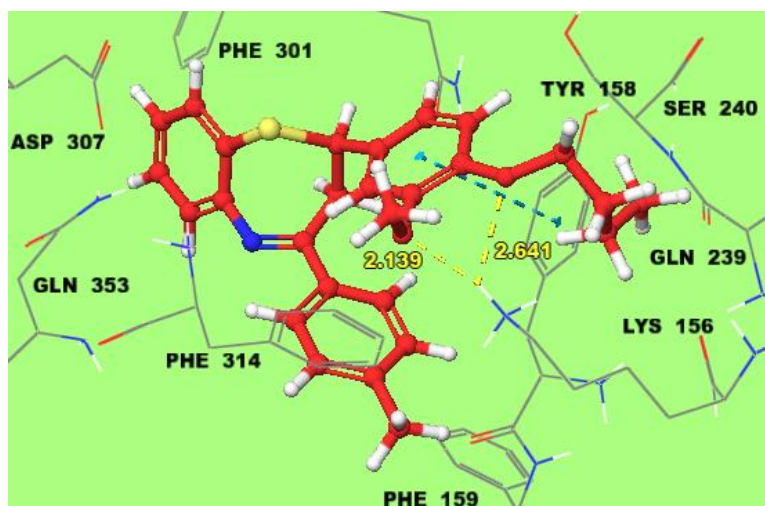

Figure S49. Docking Image of Compound 10B

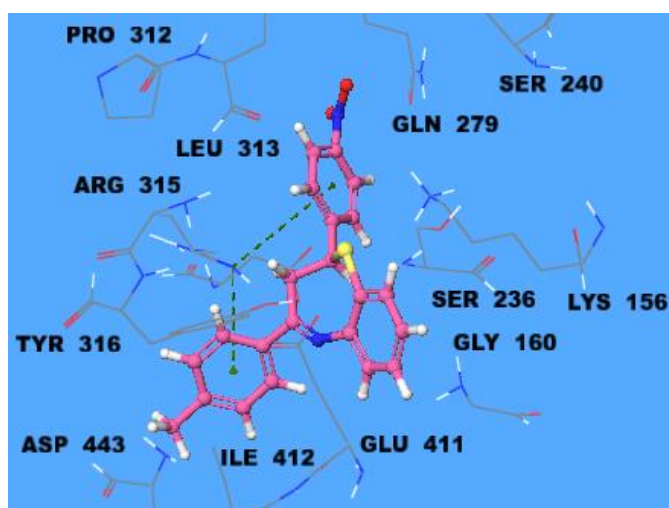

Figure S50. Docking Image of Compound 11B

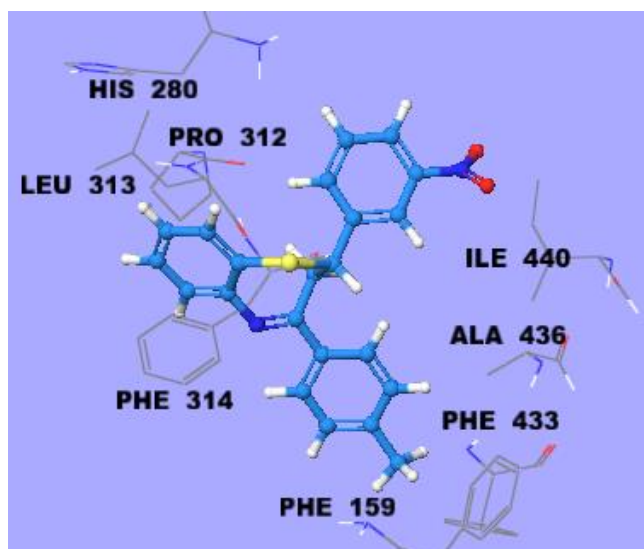

Figure S51. Docking Image of Compound 12

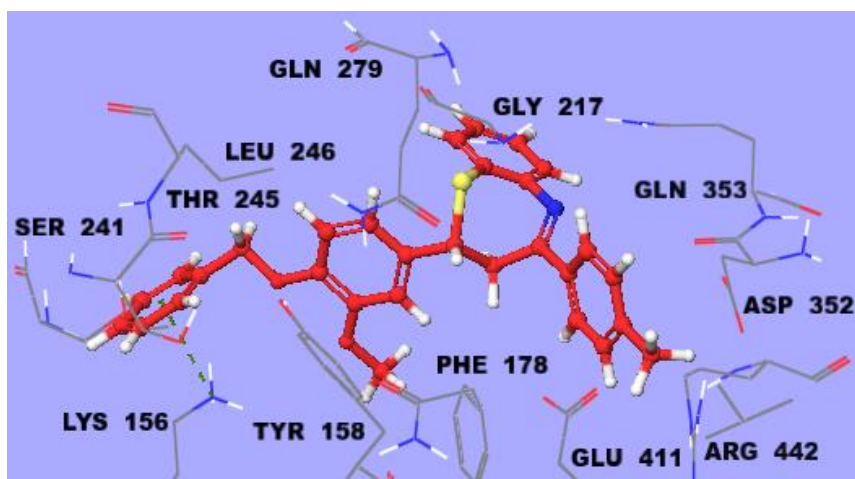

Figure S52. Docking Image of Compound 13

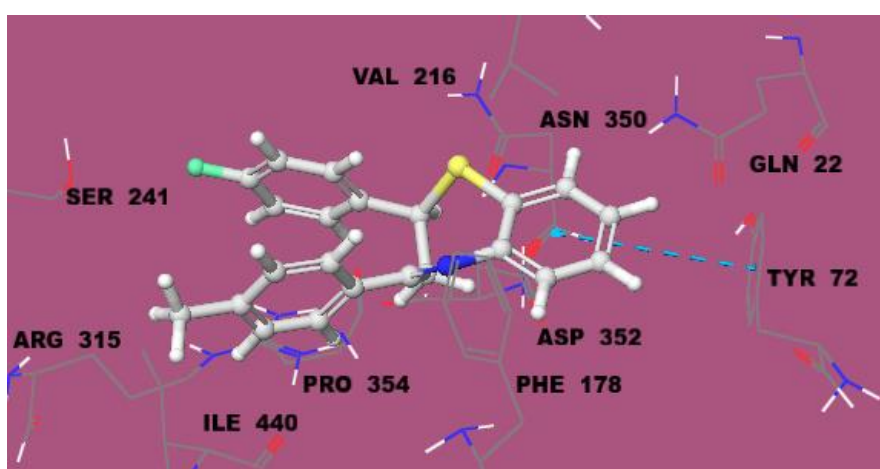

Figure S53. Docking Image of Compound 14B

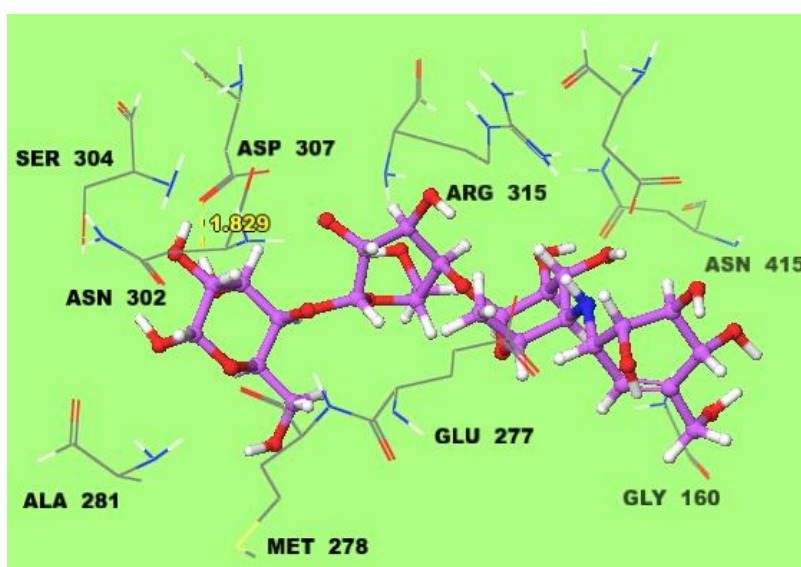

Figure S54. Docking Image of Acarbose

**Table S1:** Binding energies of the compounds **1B-14B** against various modes of glucosidase enzyme

| <b>Compound No.</b> | <b>Docking score</b> | <b>Compound No.</b> | <b>Docking score</b> |
|---------------------|----------------------|---------------------|----------------------|
|                     | <b>PDB ID 3AJ7</b>   |                     | <b>PDB ID 3AJ7</b>   |
|                     | <b>(kcal/mol)</b>    |                     | <b>(kcal/mol)</b>    |
| <b>1B</b>           | -6.5589              | <b>8B</b>           | -6.8165              |
| <b>2B</b>           | -9.5322              | <b>9B</b>           | -6.8547              |
| <b>3B</b>           | -8.8329              | <b>10B</b>          | -7.7301              |
| <b>4B</b>           | -6.2681              | <b>11B</b>          | -6.8232              |
| <b>5B</b>           | -7.5788              | <b>12B</b>          | -6.6822              |
| <b>6B</b>           | -7.7090              | <b>13B</b>          | -7.7702              |
| <b>7B</b>           | -7.9781              | <b>14B</b>          | -6.4343              |
| <b>Acarbose</b>     |                      | -5.5322             |                      |
| <b>(Standard)</b>   |                      |                     |                      |

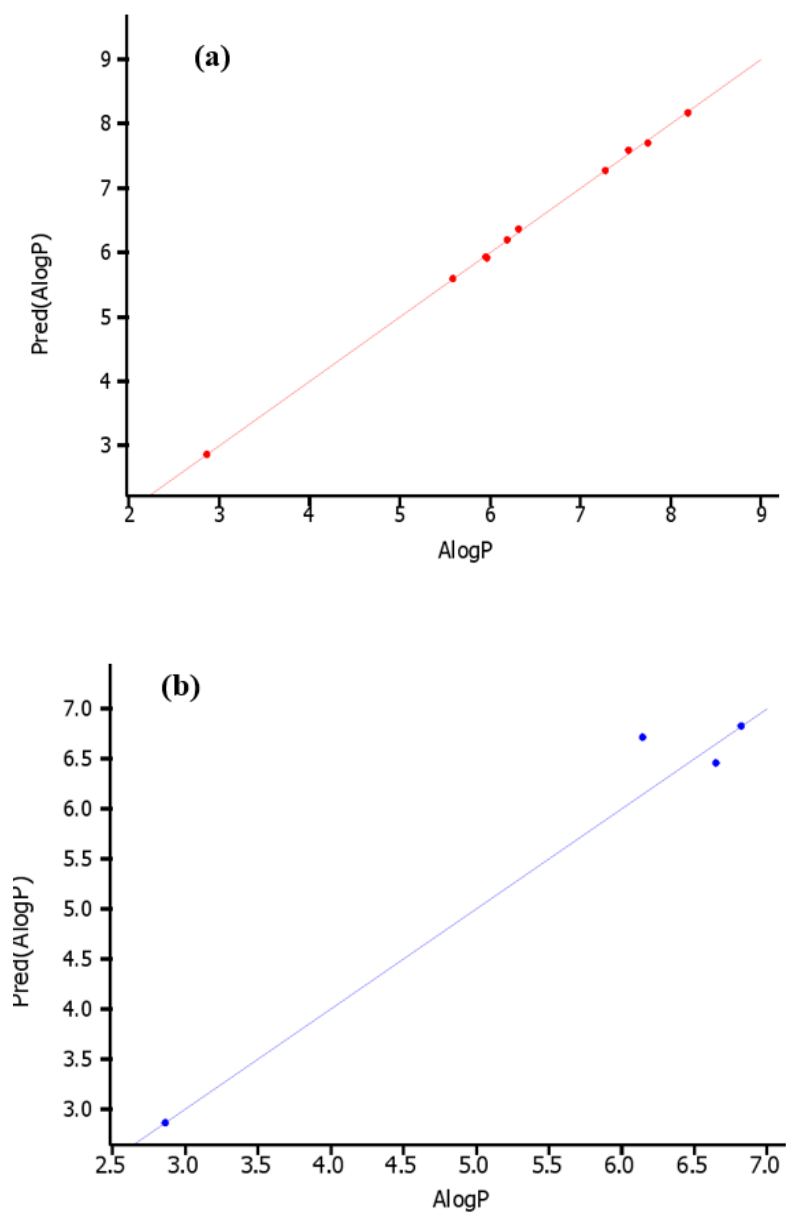

**Figure S55:** Plot of experimental versus predicted telomerase inhibitory activities of test set (a) and training set (b).
